# Supplementary material for: Purin-6-One Derivatives as Phosphodiesterase-2 Inhibitors
Source: Hindawi journal article supplement (doi:10.1155/2016/6878353), 2016-01-01

## Supplementary content

### Purin-6-One Derivatives as Phosphodiesterase-2 Inhibitors

Wei Yuan,<sup>a</sup> Xin-Yun Zhao,<sup>a,\*</sup> Xi Chen,<sup>a,\*</sup> and Chang-Guo Zhan<sup>b</sup>

<sup>a</sup> *College of Chemistry and Materials Science, South-Central University for Nationalities, Wuhan, 430074, P. R. China*

<sup>b</sup> *Department of Pharmaceutical Sciences, College of Pharmacy, University of Kentucky, 789 S. Limestone, Lexington, KY, 40536, USA*

The supporting information provides the <sup>1</sup>H NMR and <sup>13</sup>C NMR Spectra of target molecules **2b-2s** :

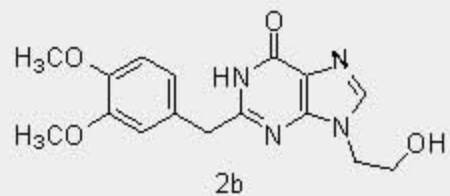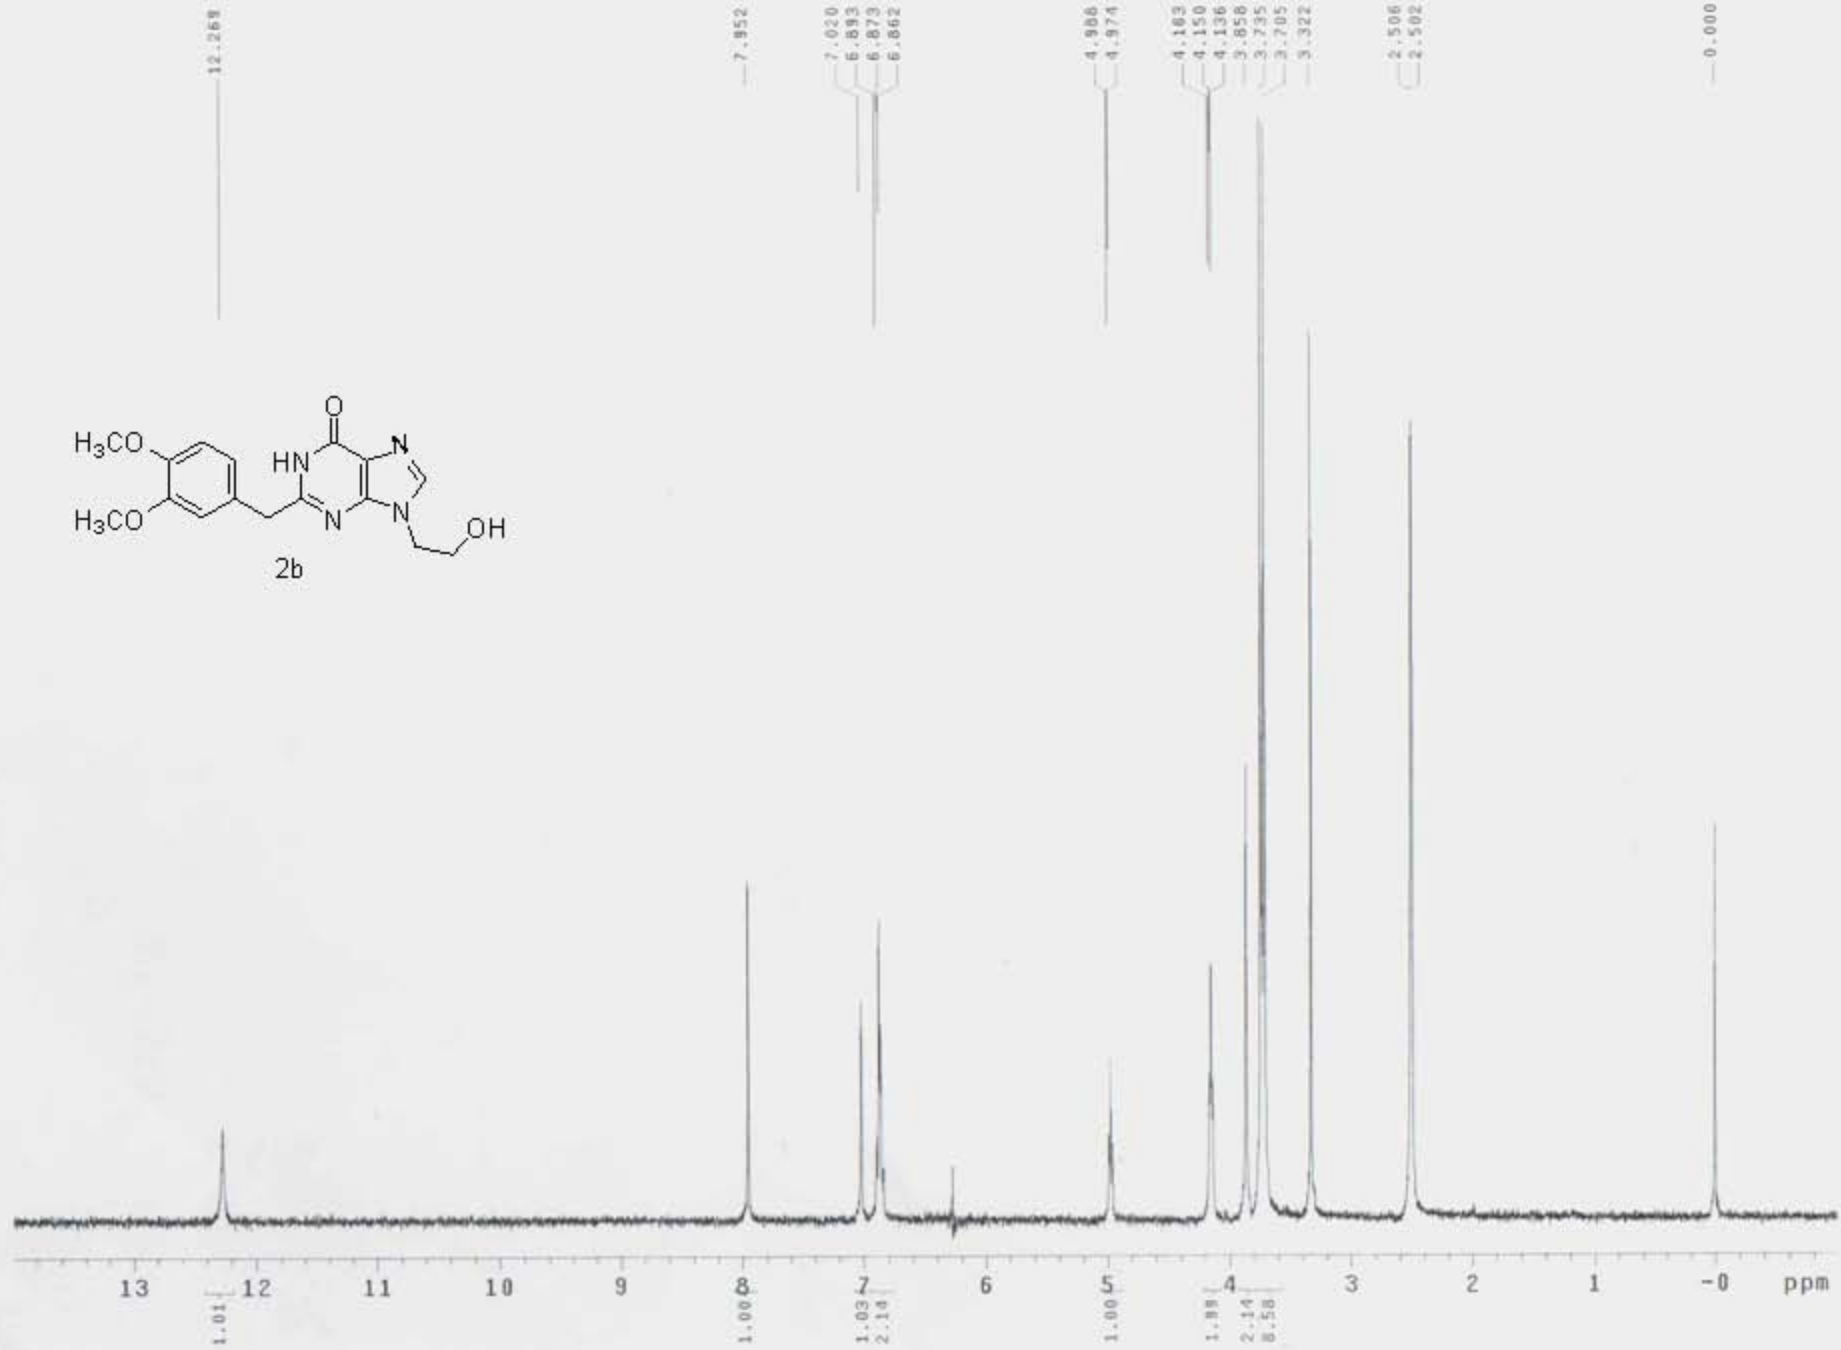

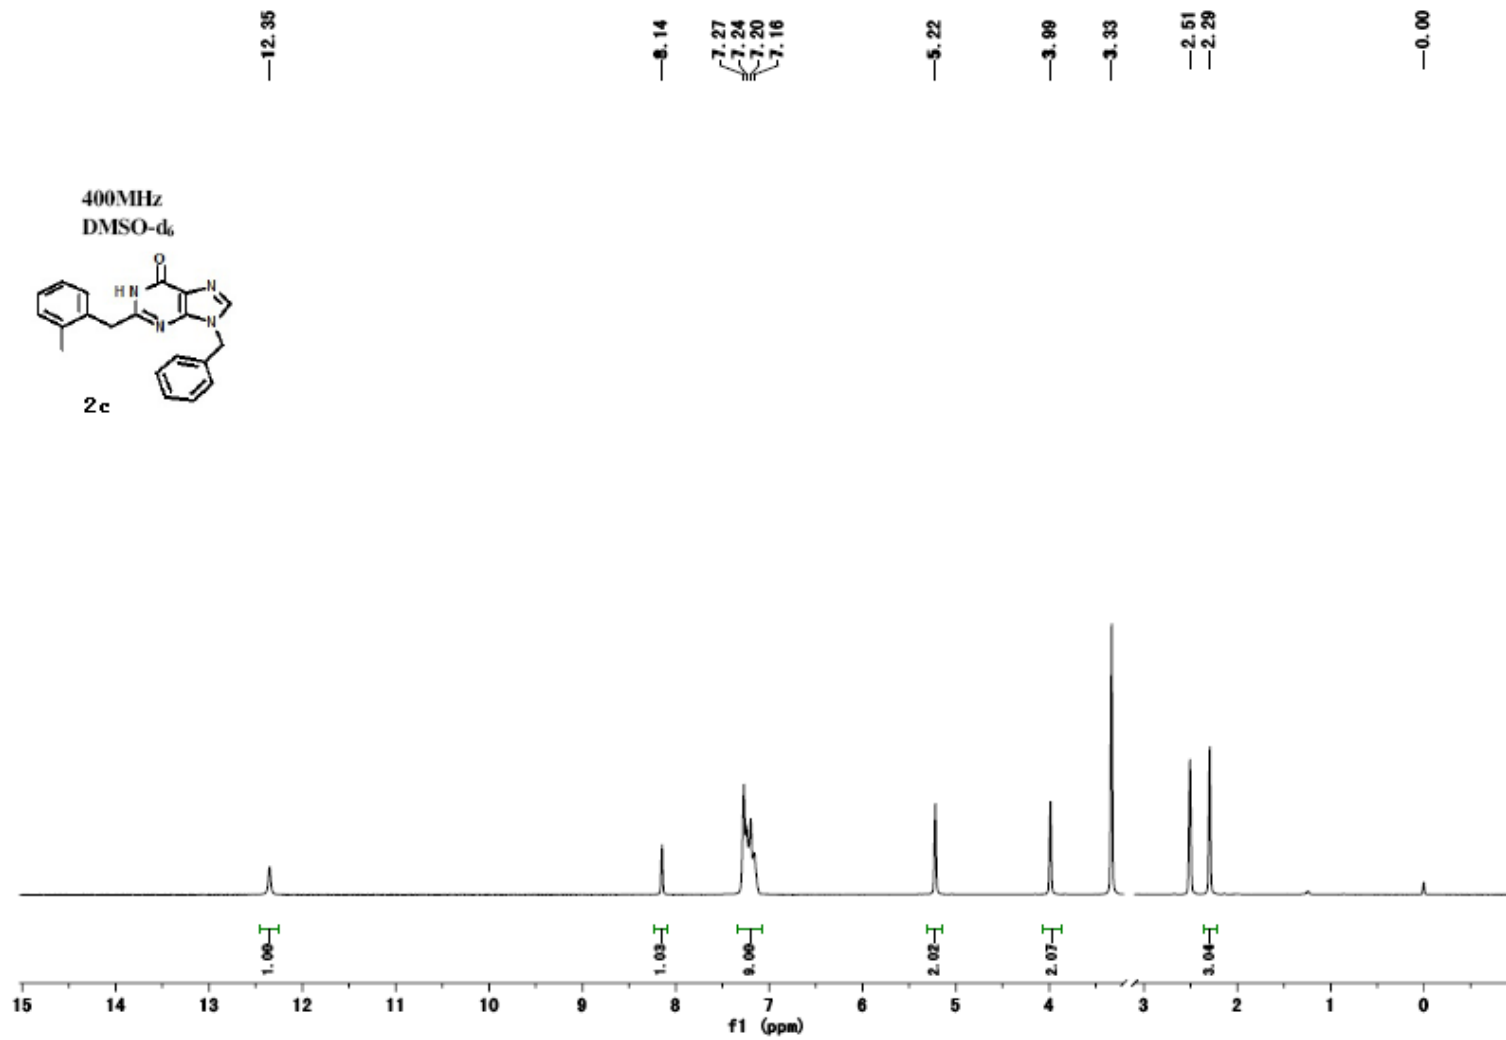

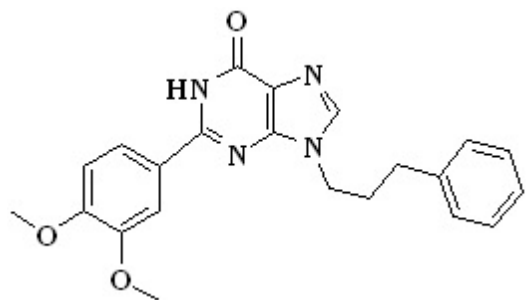

2d

600MHz  
DMSO-d<sub>6</sub>

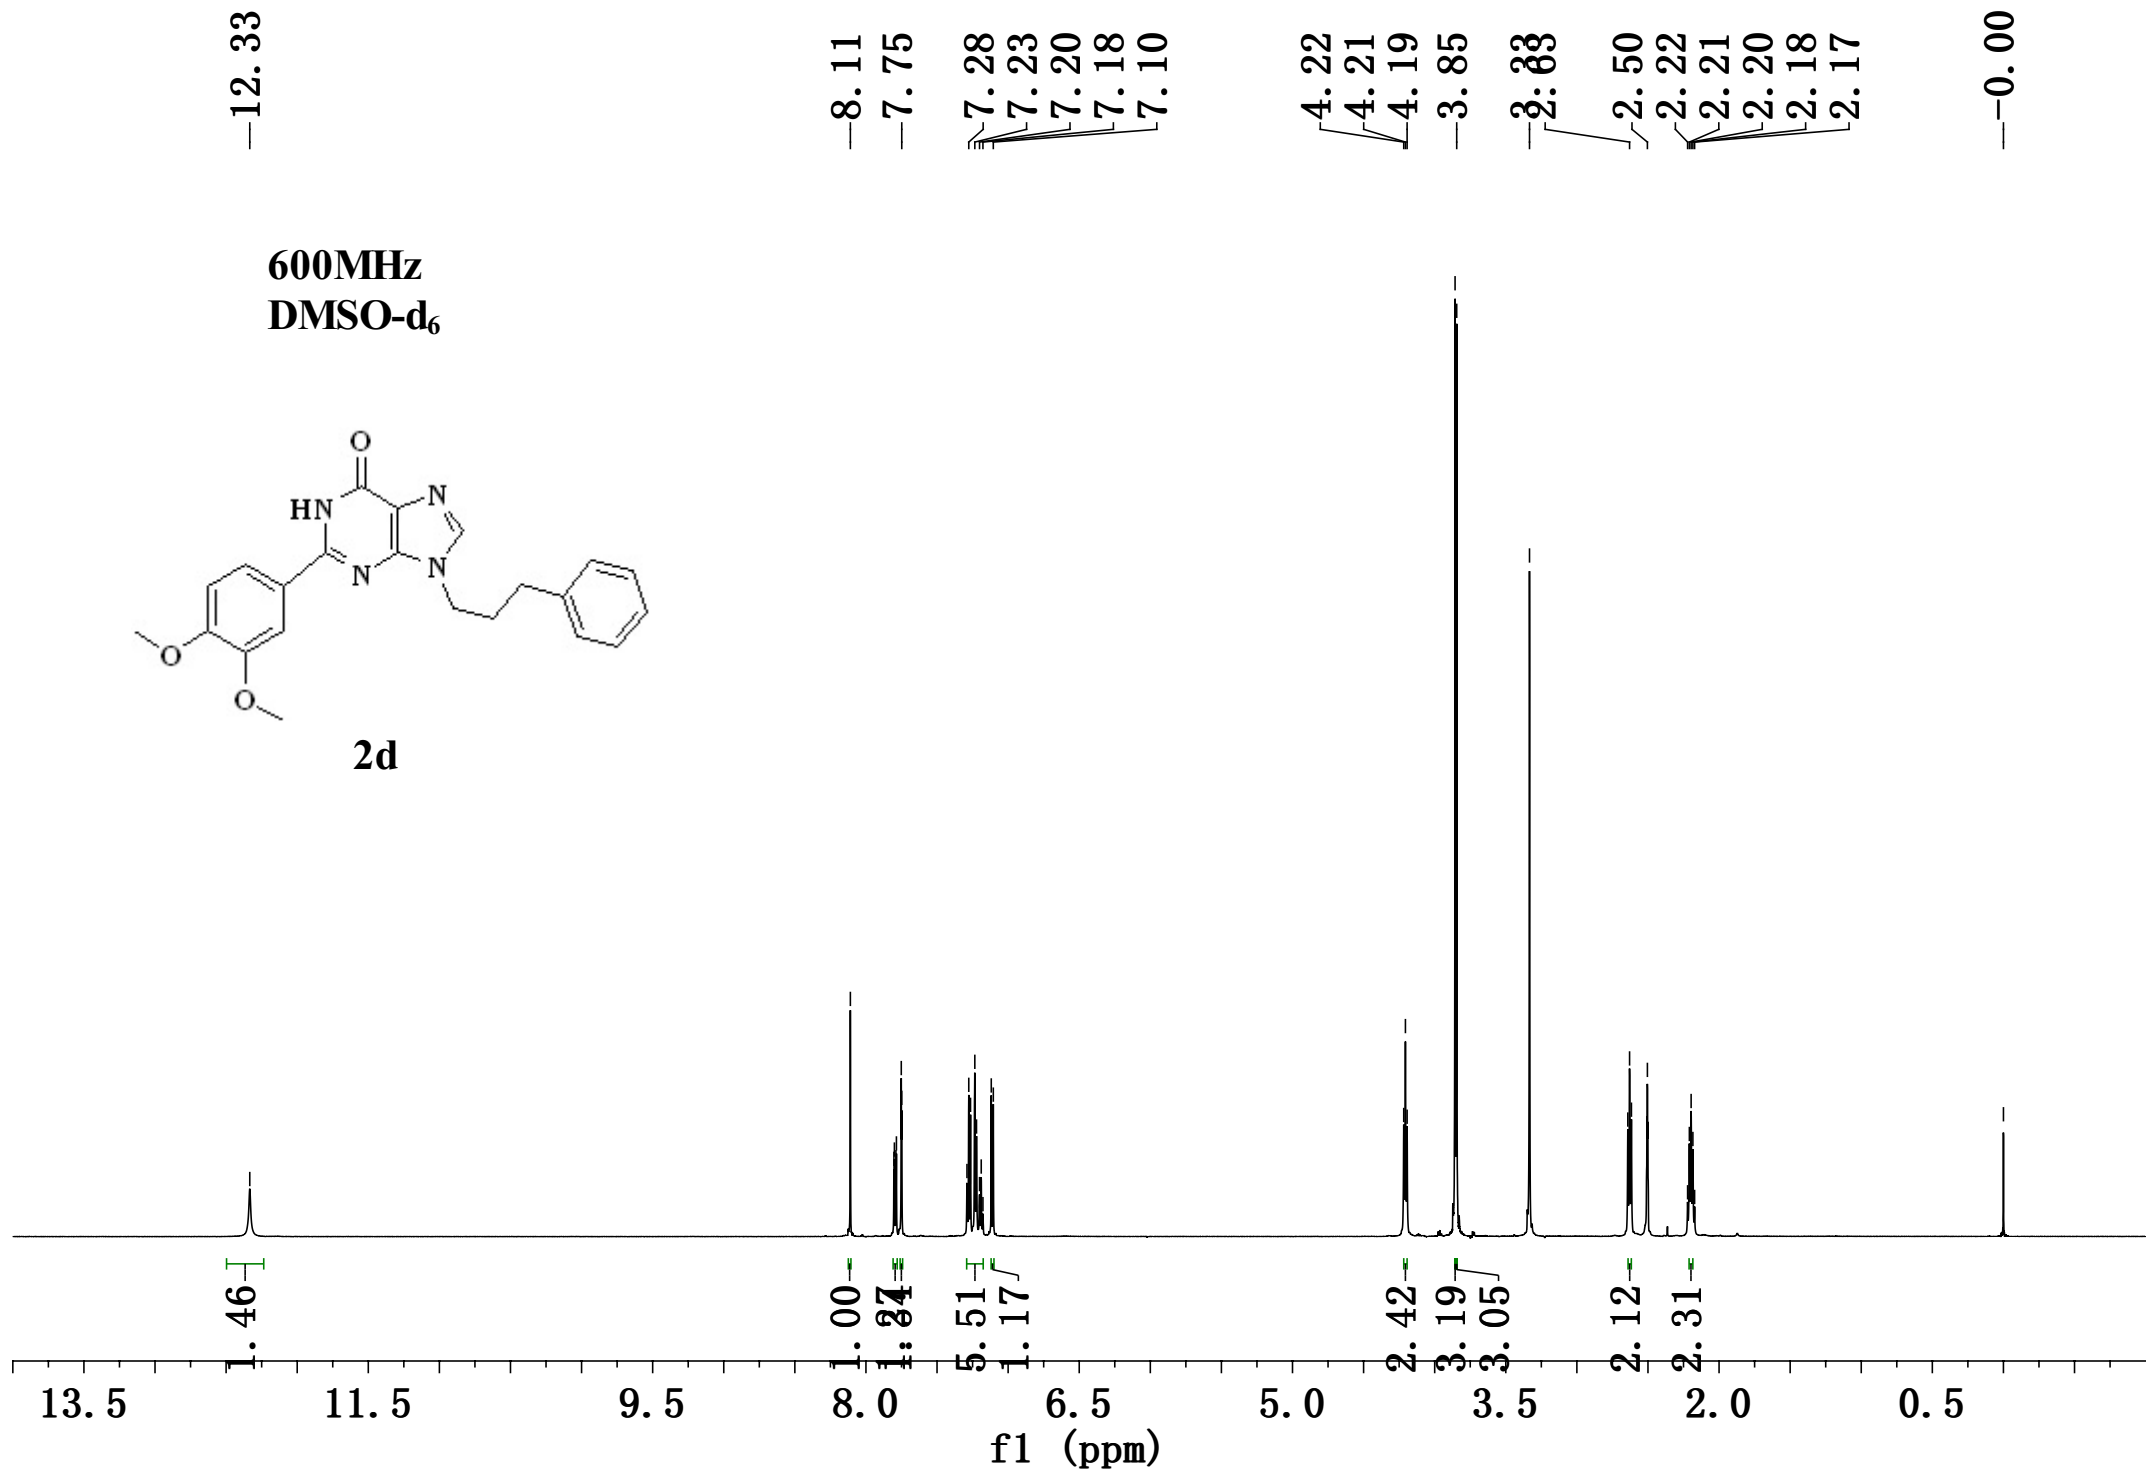

600MHz  
DMSO-d<sub>6</sub>

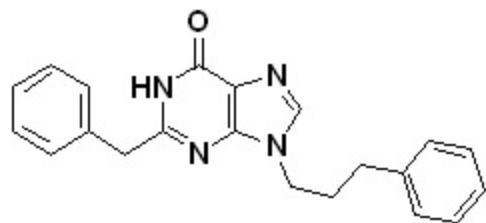

2e

-12.38

8.04

7.24

7.23

7.19

7.17

7.16

7.15

4.13

4.12

4.11

3.96

3.34

2.54

2.50

2.11

2.10

2.09

2.08

-0.00

1.10

1.00

10.20

2.38

2.31

2.32

2.32

13.0

11.0

9.0

7.5

f1 (ppm)

4.5

3.0

1.5

0.0

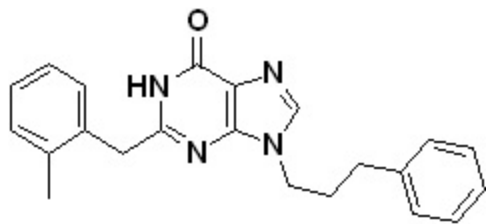

2f

600MHz  
DMSO-d<sub>6</sub>

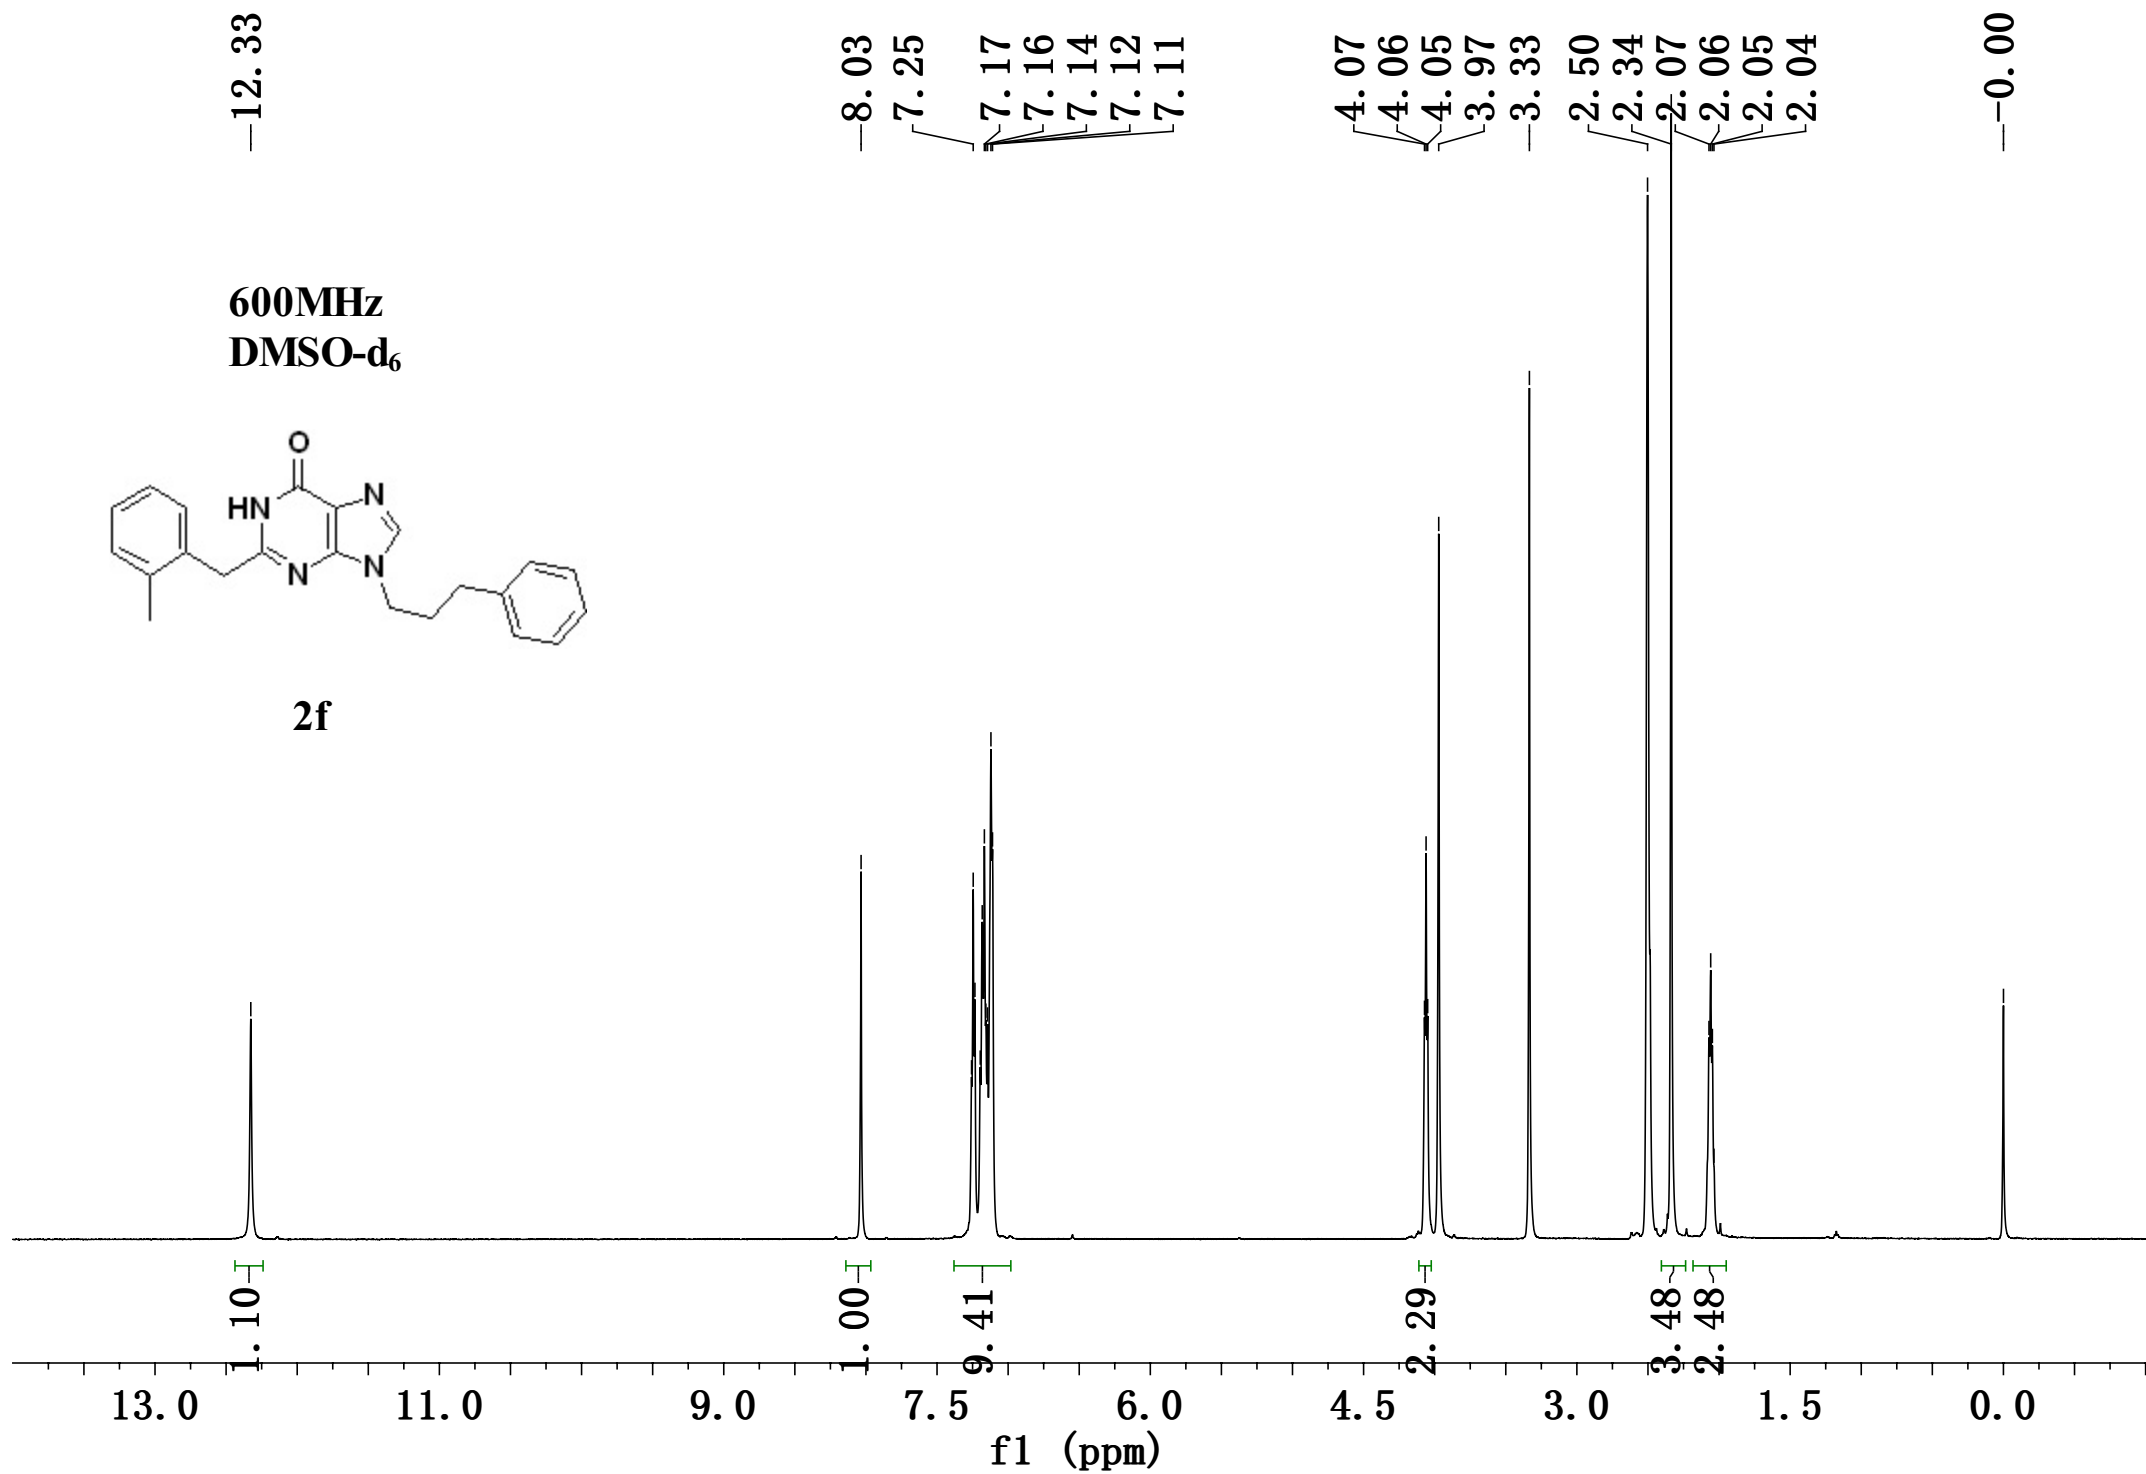

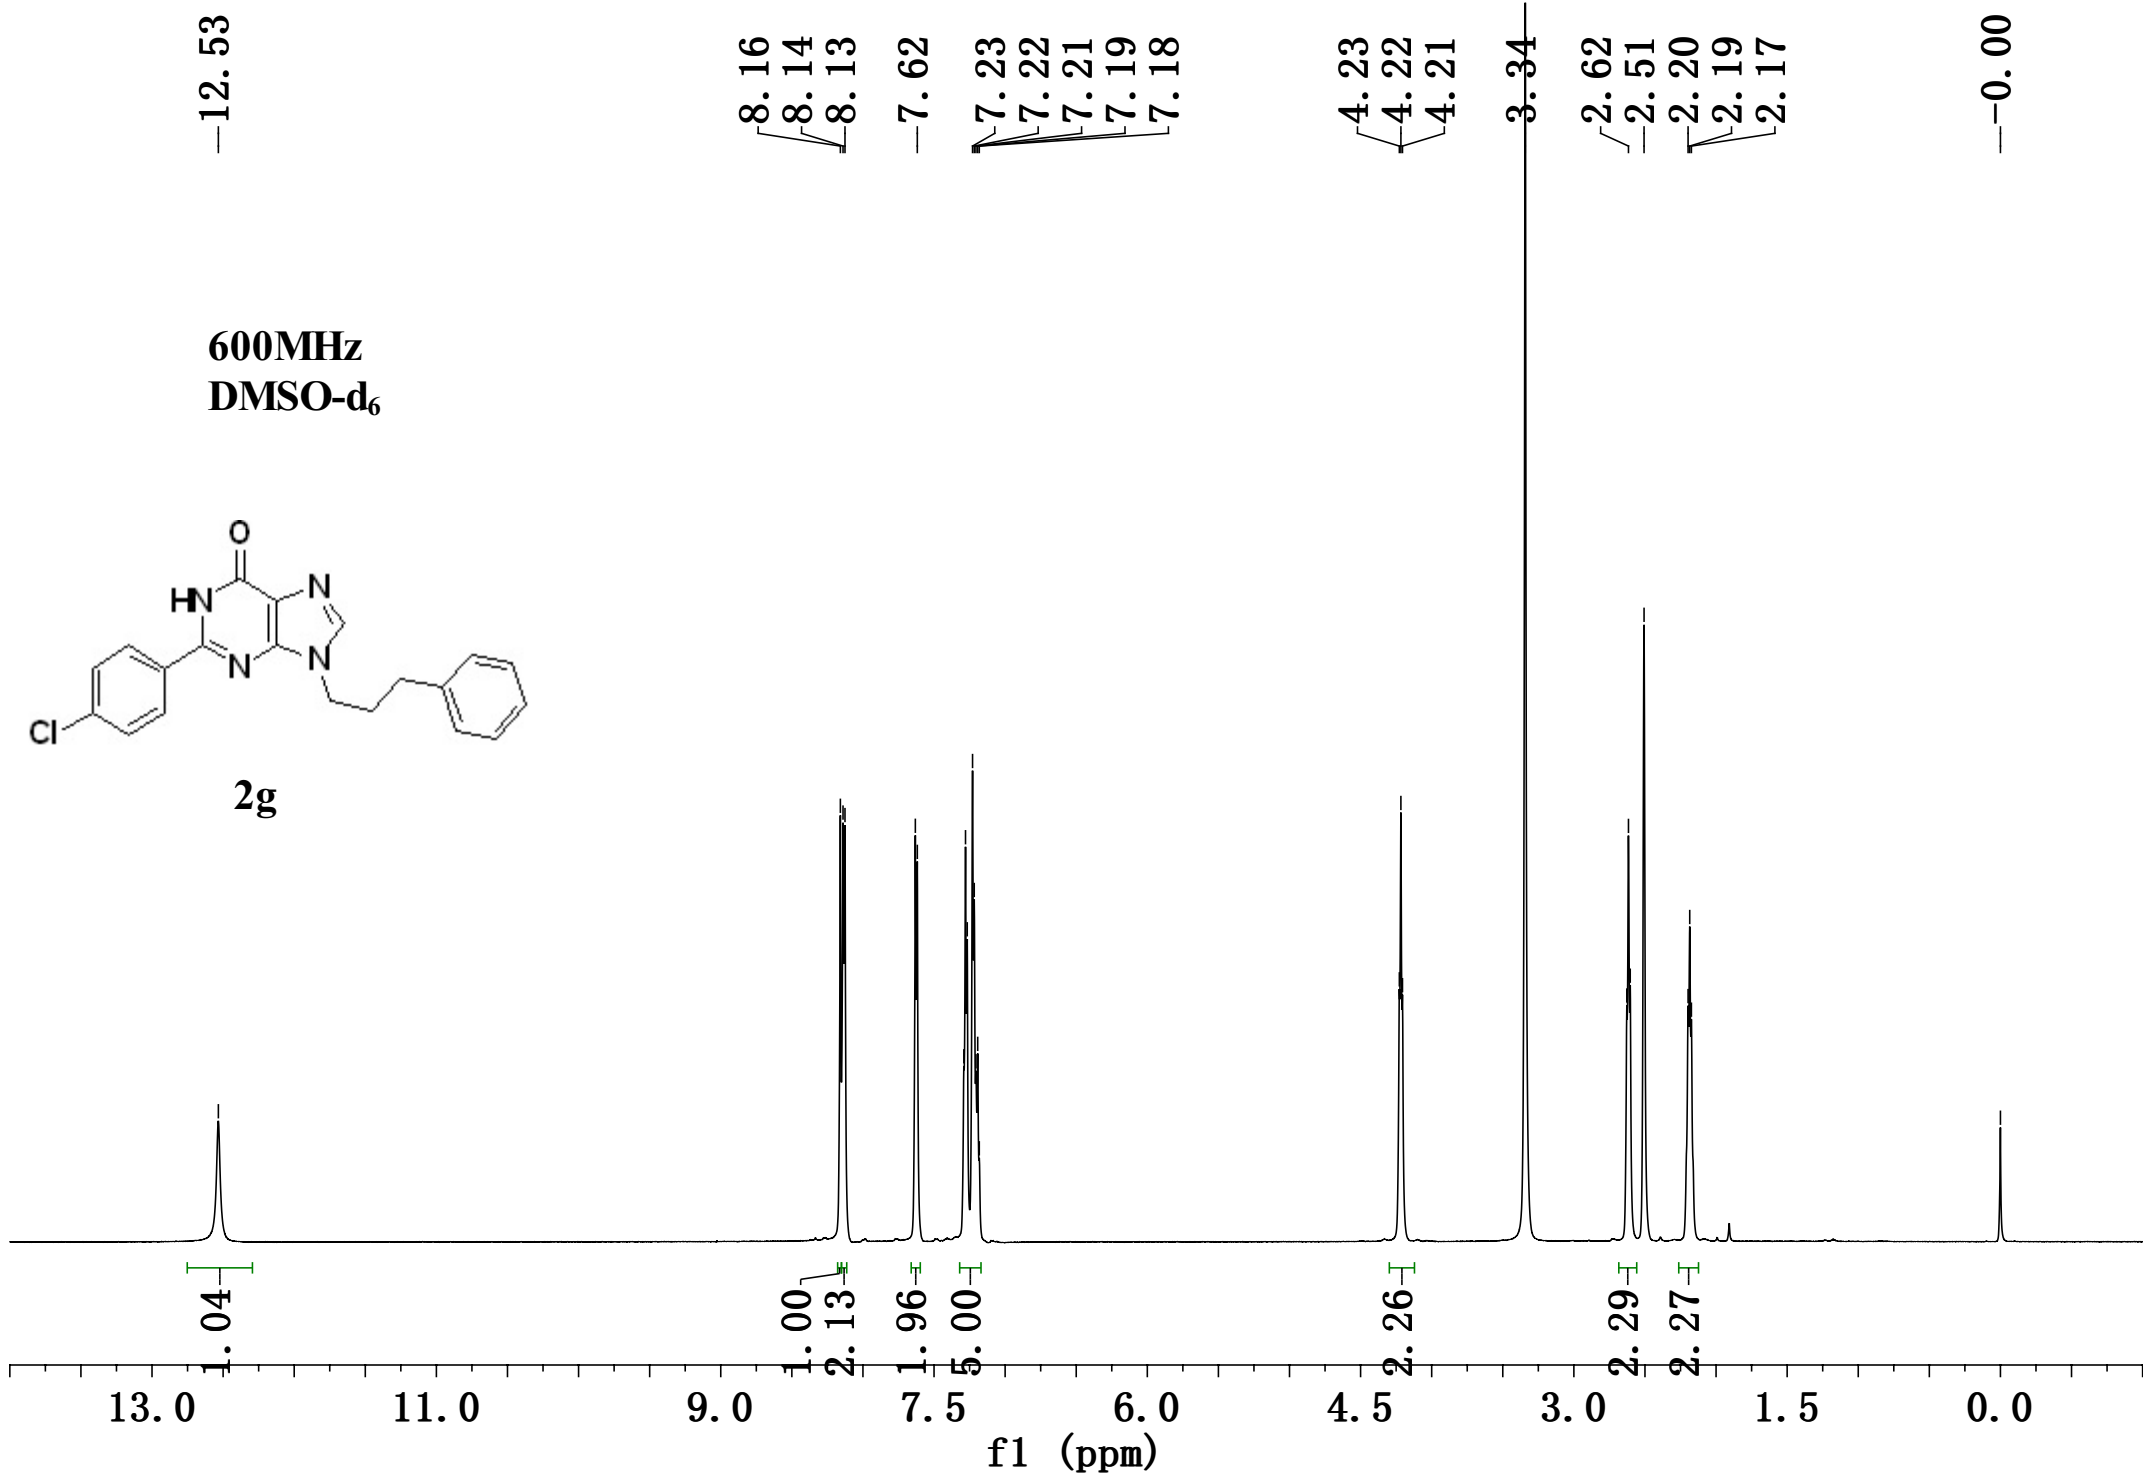

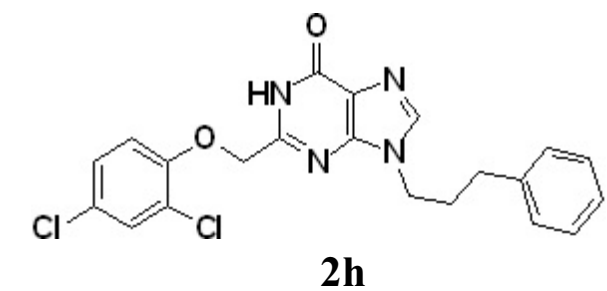

600MHz  
DMSO-d<sub>6</sub>

-12.51

-8.11

-7.58

-7.26

-7.25

-7.17

-7.13

-5.14

-4.13

-4.11

-4.10

-3.30

-2.50

-2.48

-2.05

-2.04

-2.03

--0.00

1.10

1.00

0.73

7.35

2.37

2.39

2.45

2.41

13.0

11.0

9.0

7.5

6.0

4.5

3.0

1.5

0.0

f1 (ppm)



-12.38

DMSO-d<sub>6</sub>  
600MHz

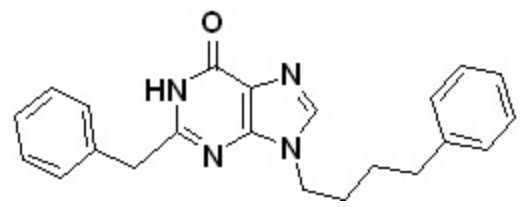

2i

-8.04  
7.32  
7.28  
7.26  
7.24  
7.22  
7.16  
7.13

4.13  
4.12  
4.11  
3.94  
-3.35

2.56  
2.55  
2.51  
1.79  
1.77  
1.51  
1.48  
1.46

-0.00

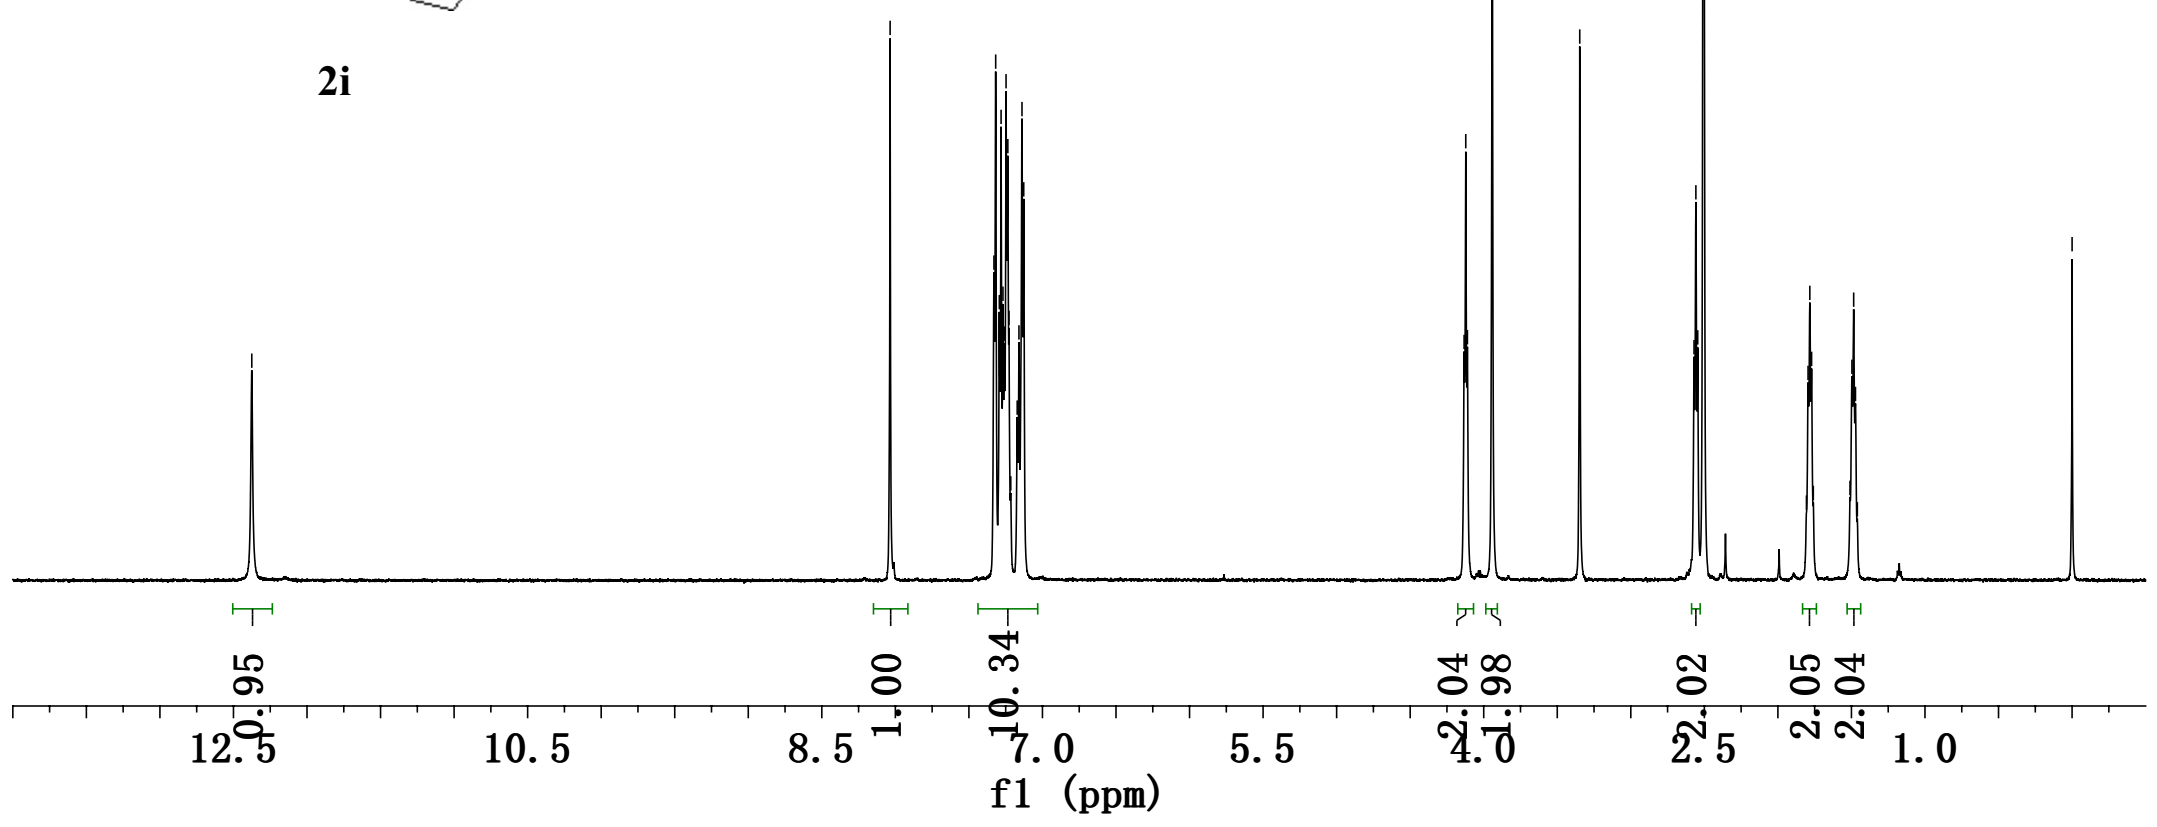

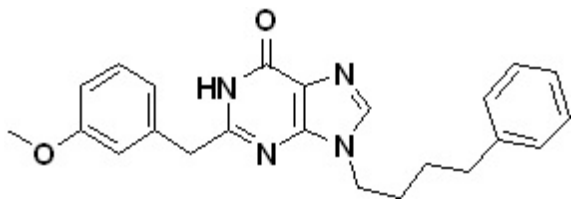

2j

600MHz  
DMSO-d<sub>6</sub>

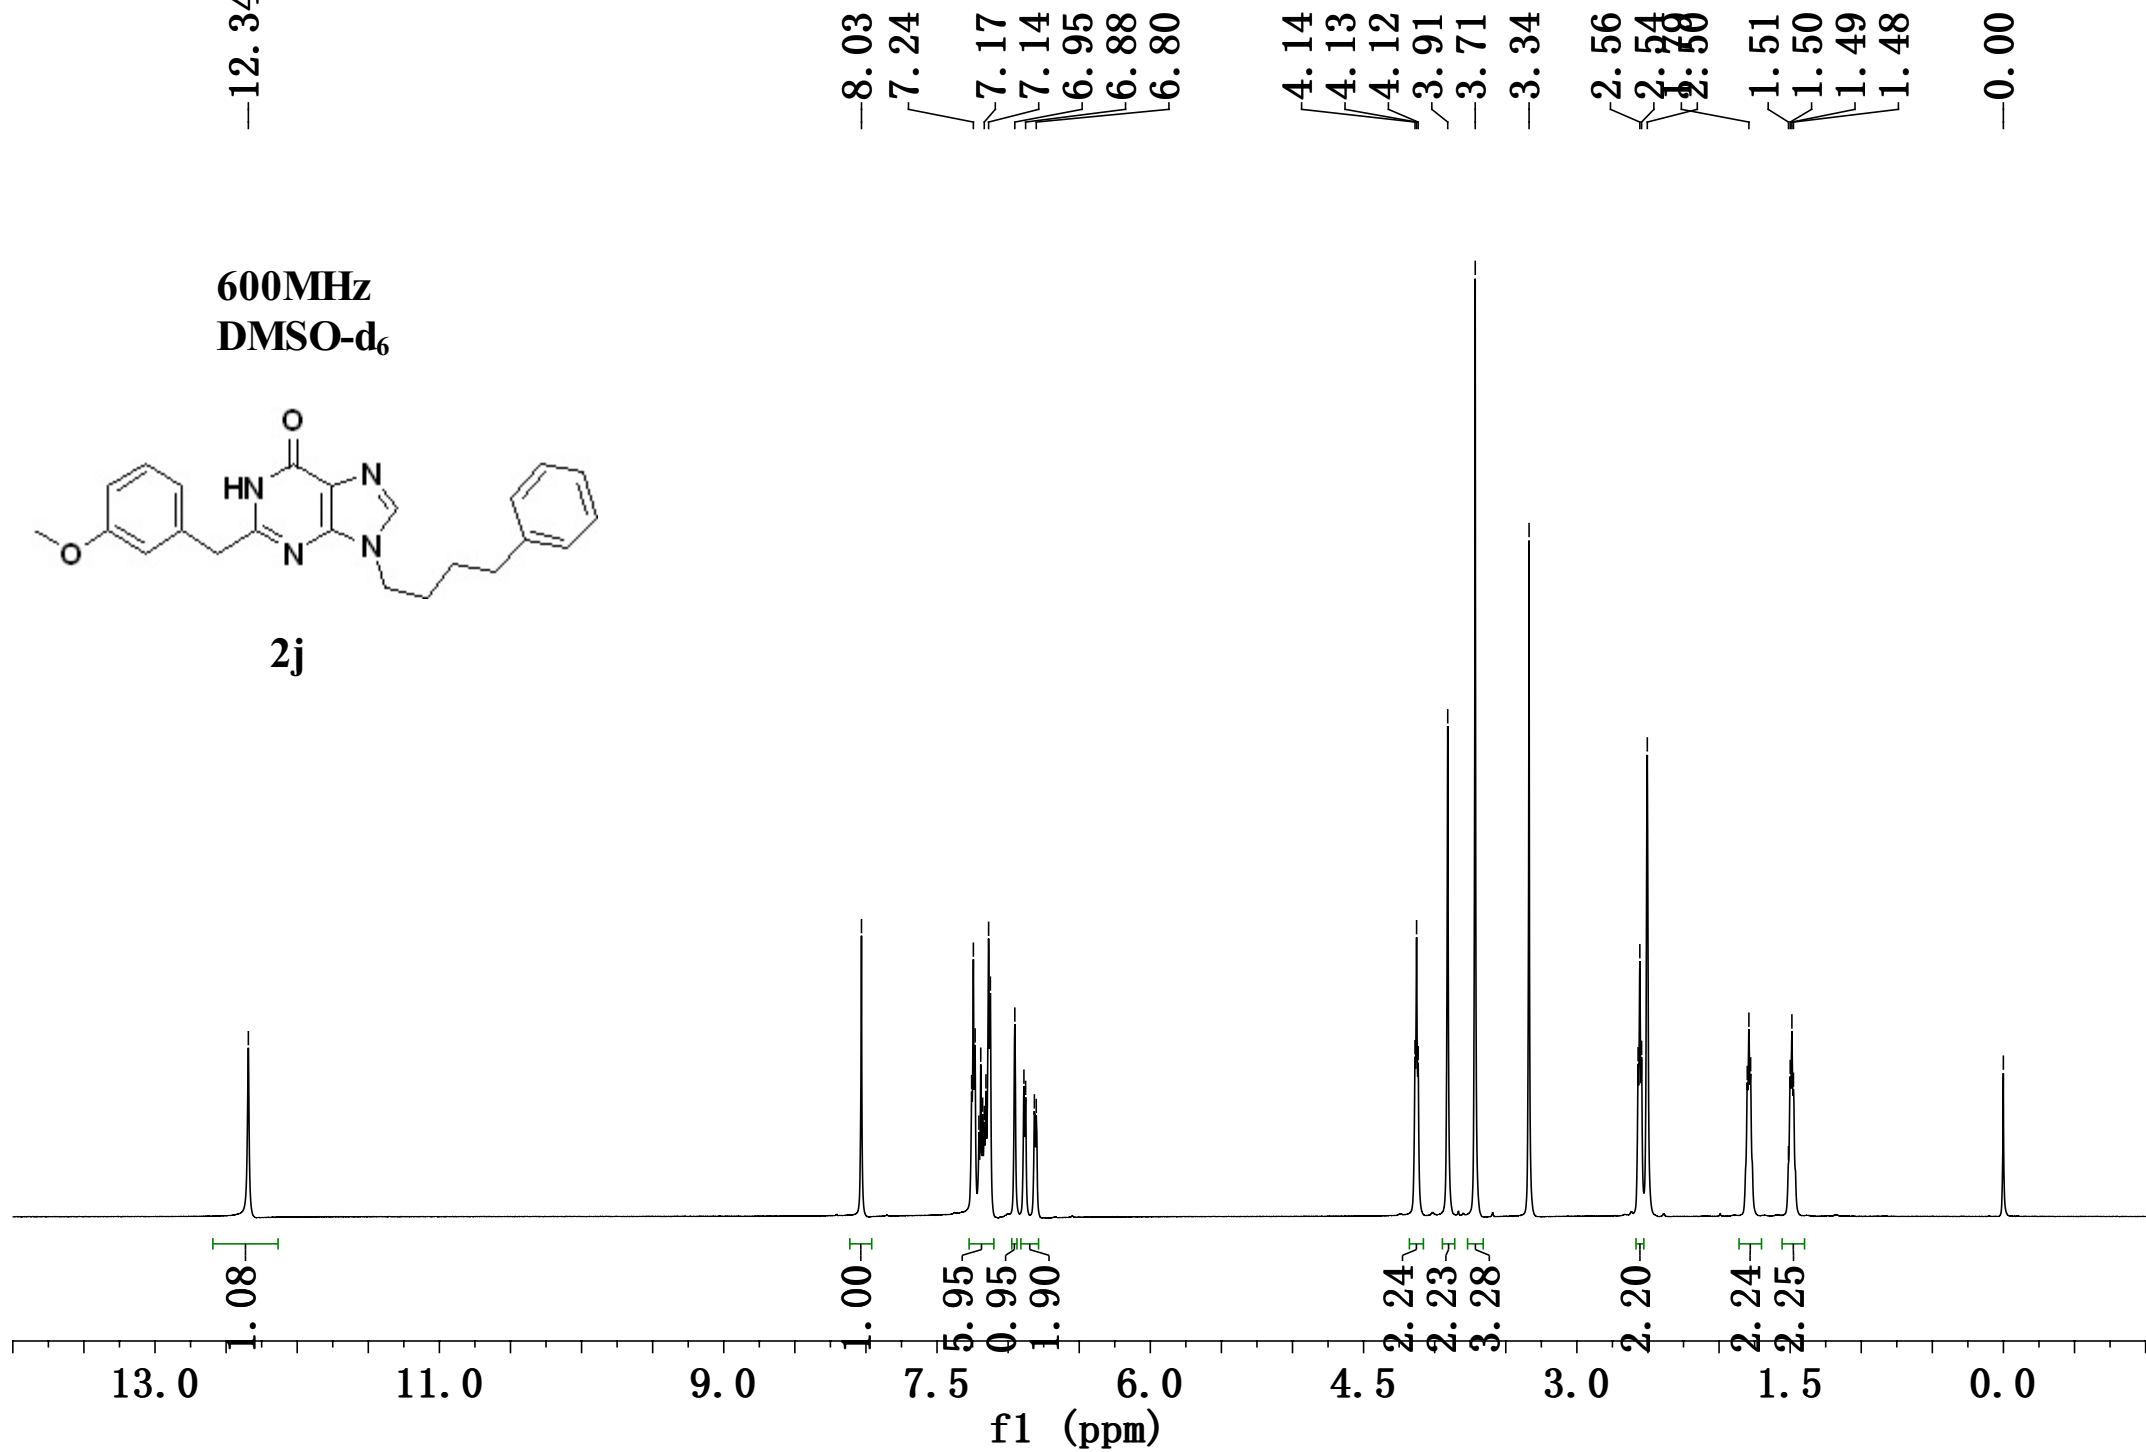

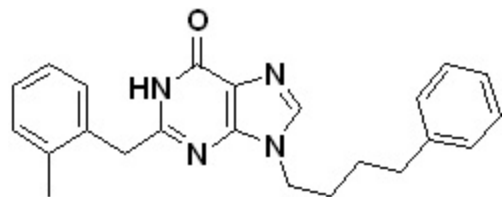

2k

600MHz  
DMSO-d<sub>6</sub>

-12.31

-8.02

7.24

7.17

7.15

7.13

7.11

7.10

4.07

4.06

4.05

3.96

3.33

2.50

2.32

1.74

1.45

1.43

1.42

-0.00

1.07

1.00

9.22

2.20

2.18

3.36

2.36

2.31

13.5

11.5

9.5

8.0

f1 (ppm)

5.0

3.5

2.0

0.5

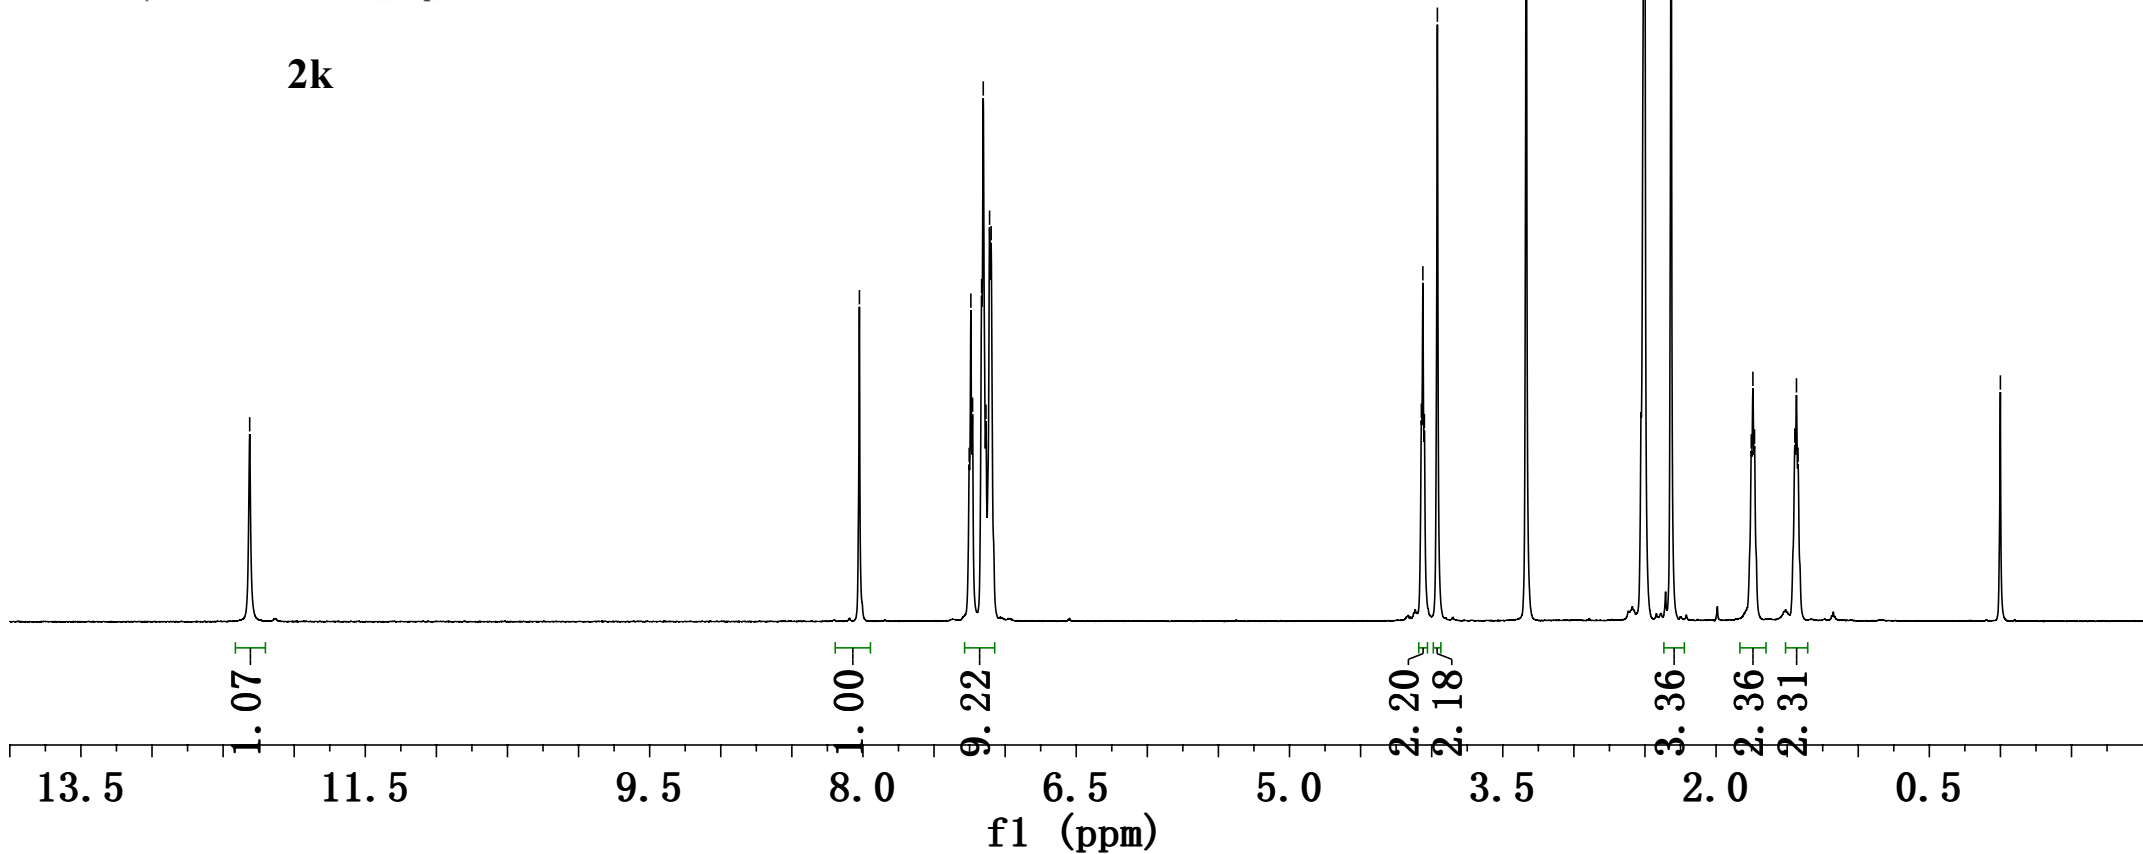

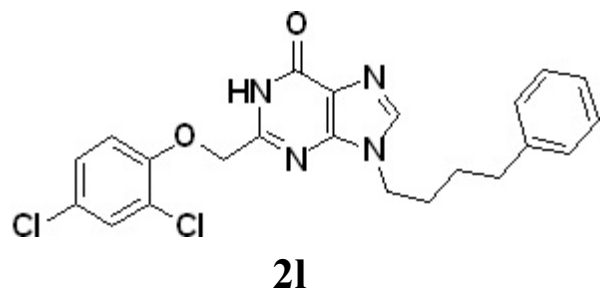

600MHz  
DMSO-d<sub>6</sub>

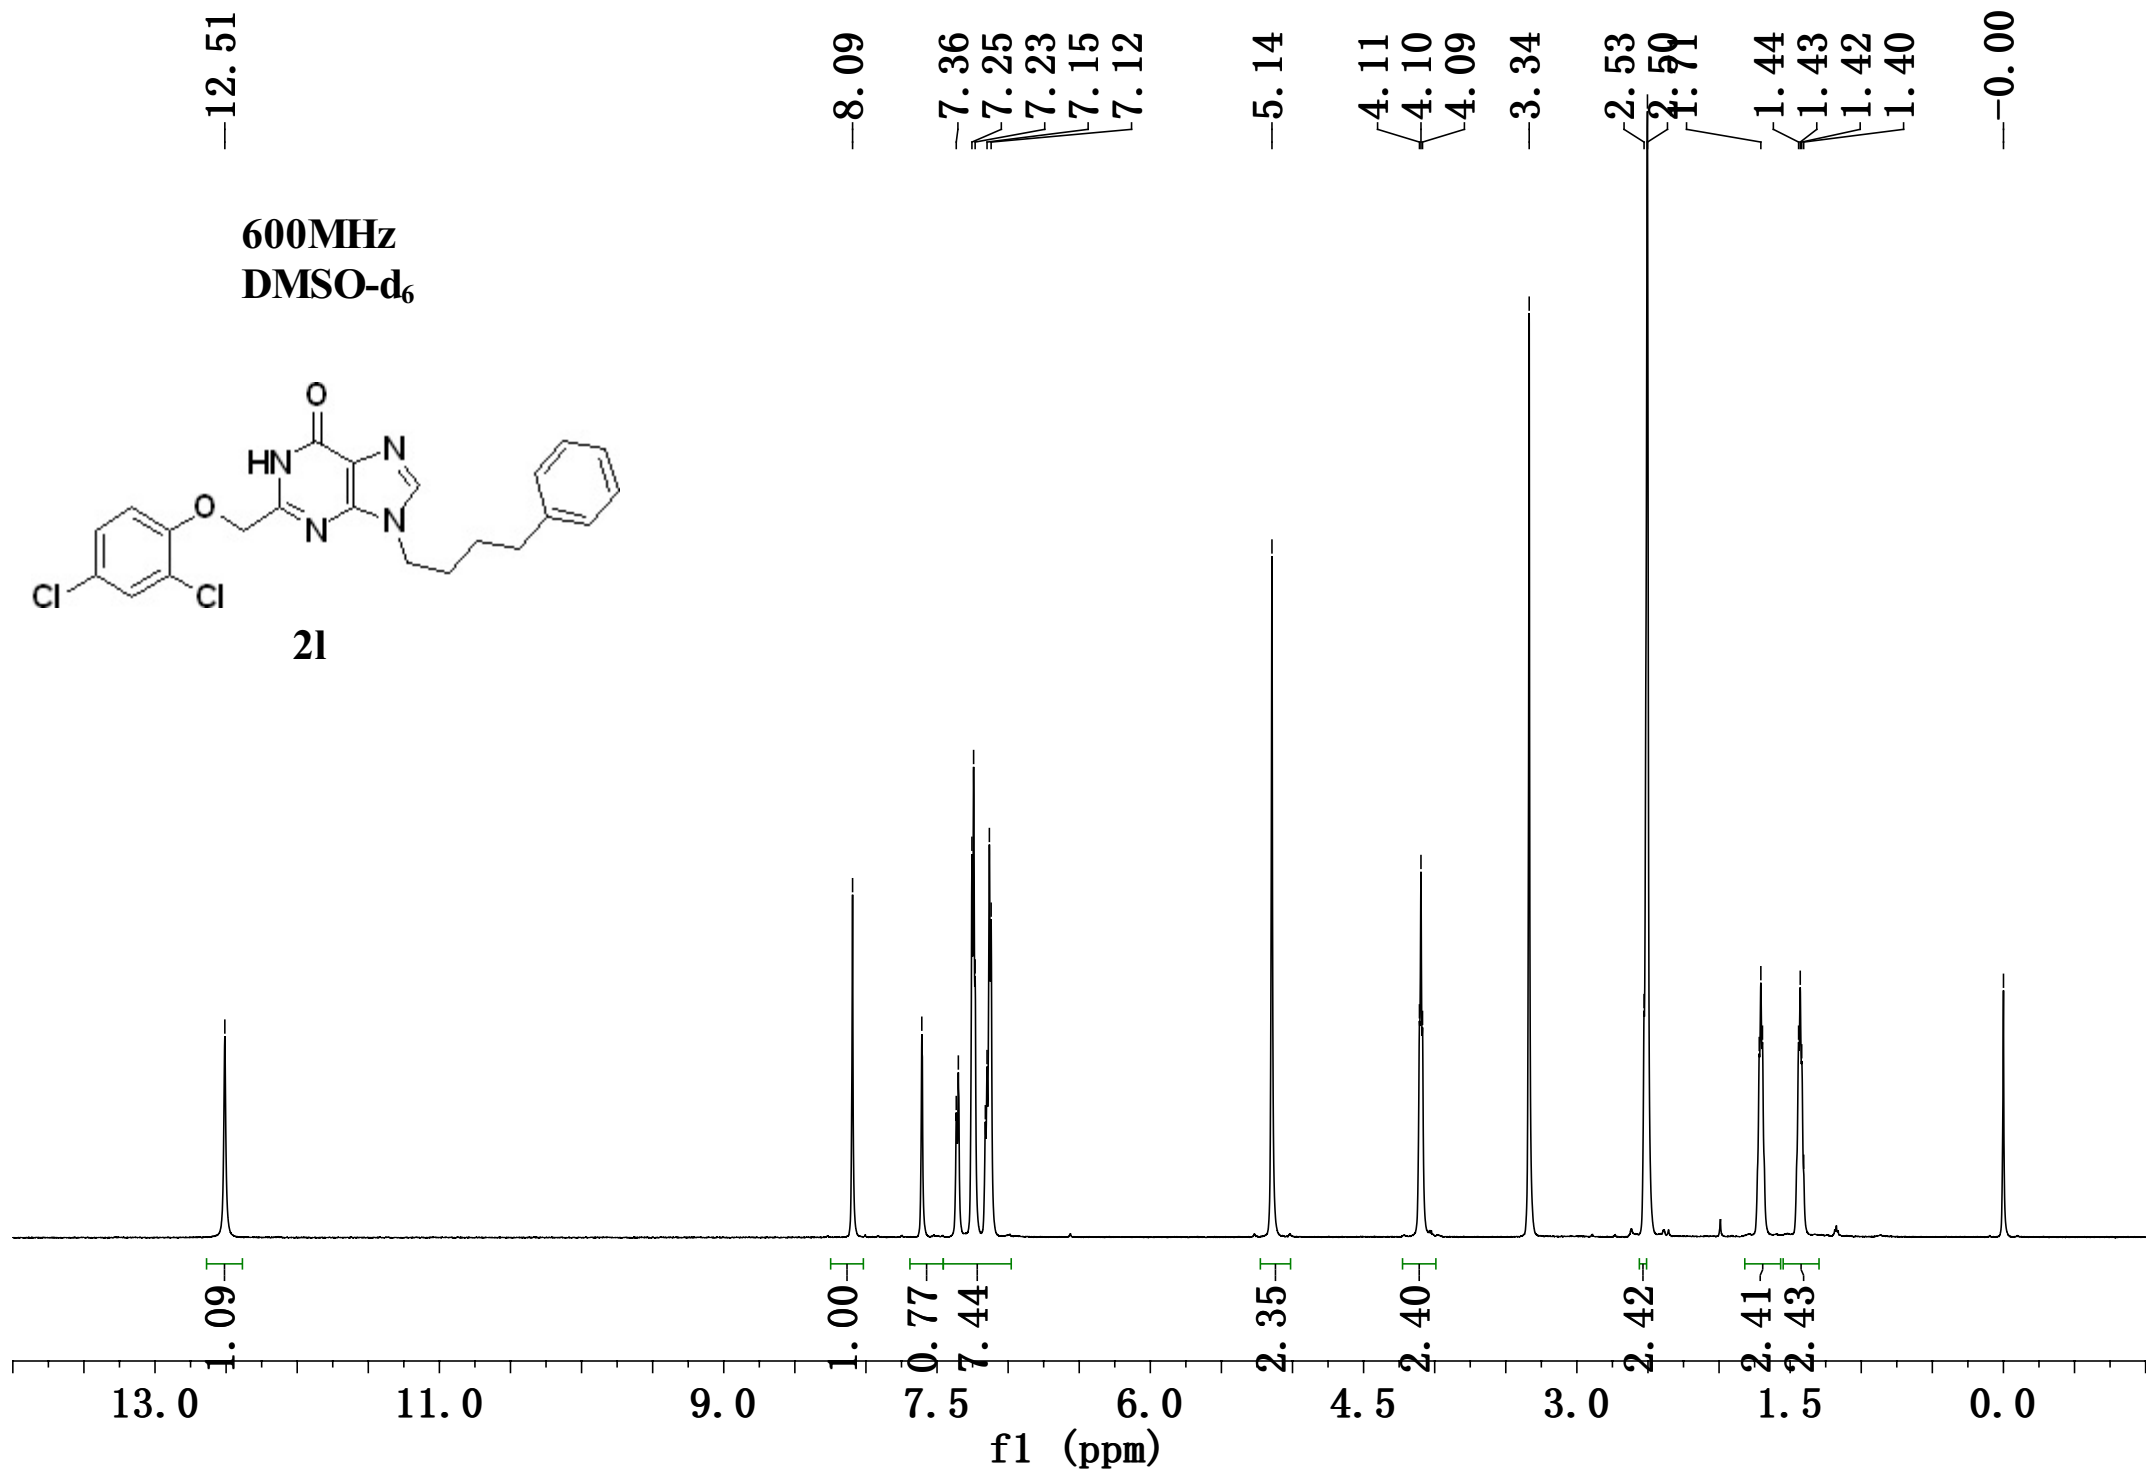

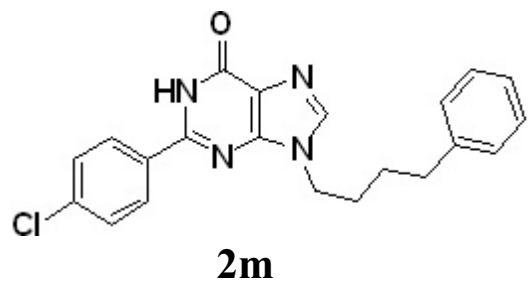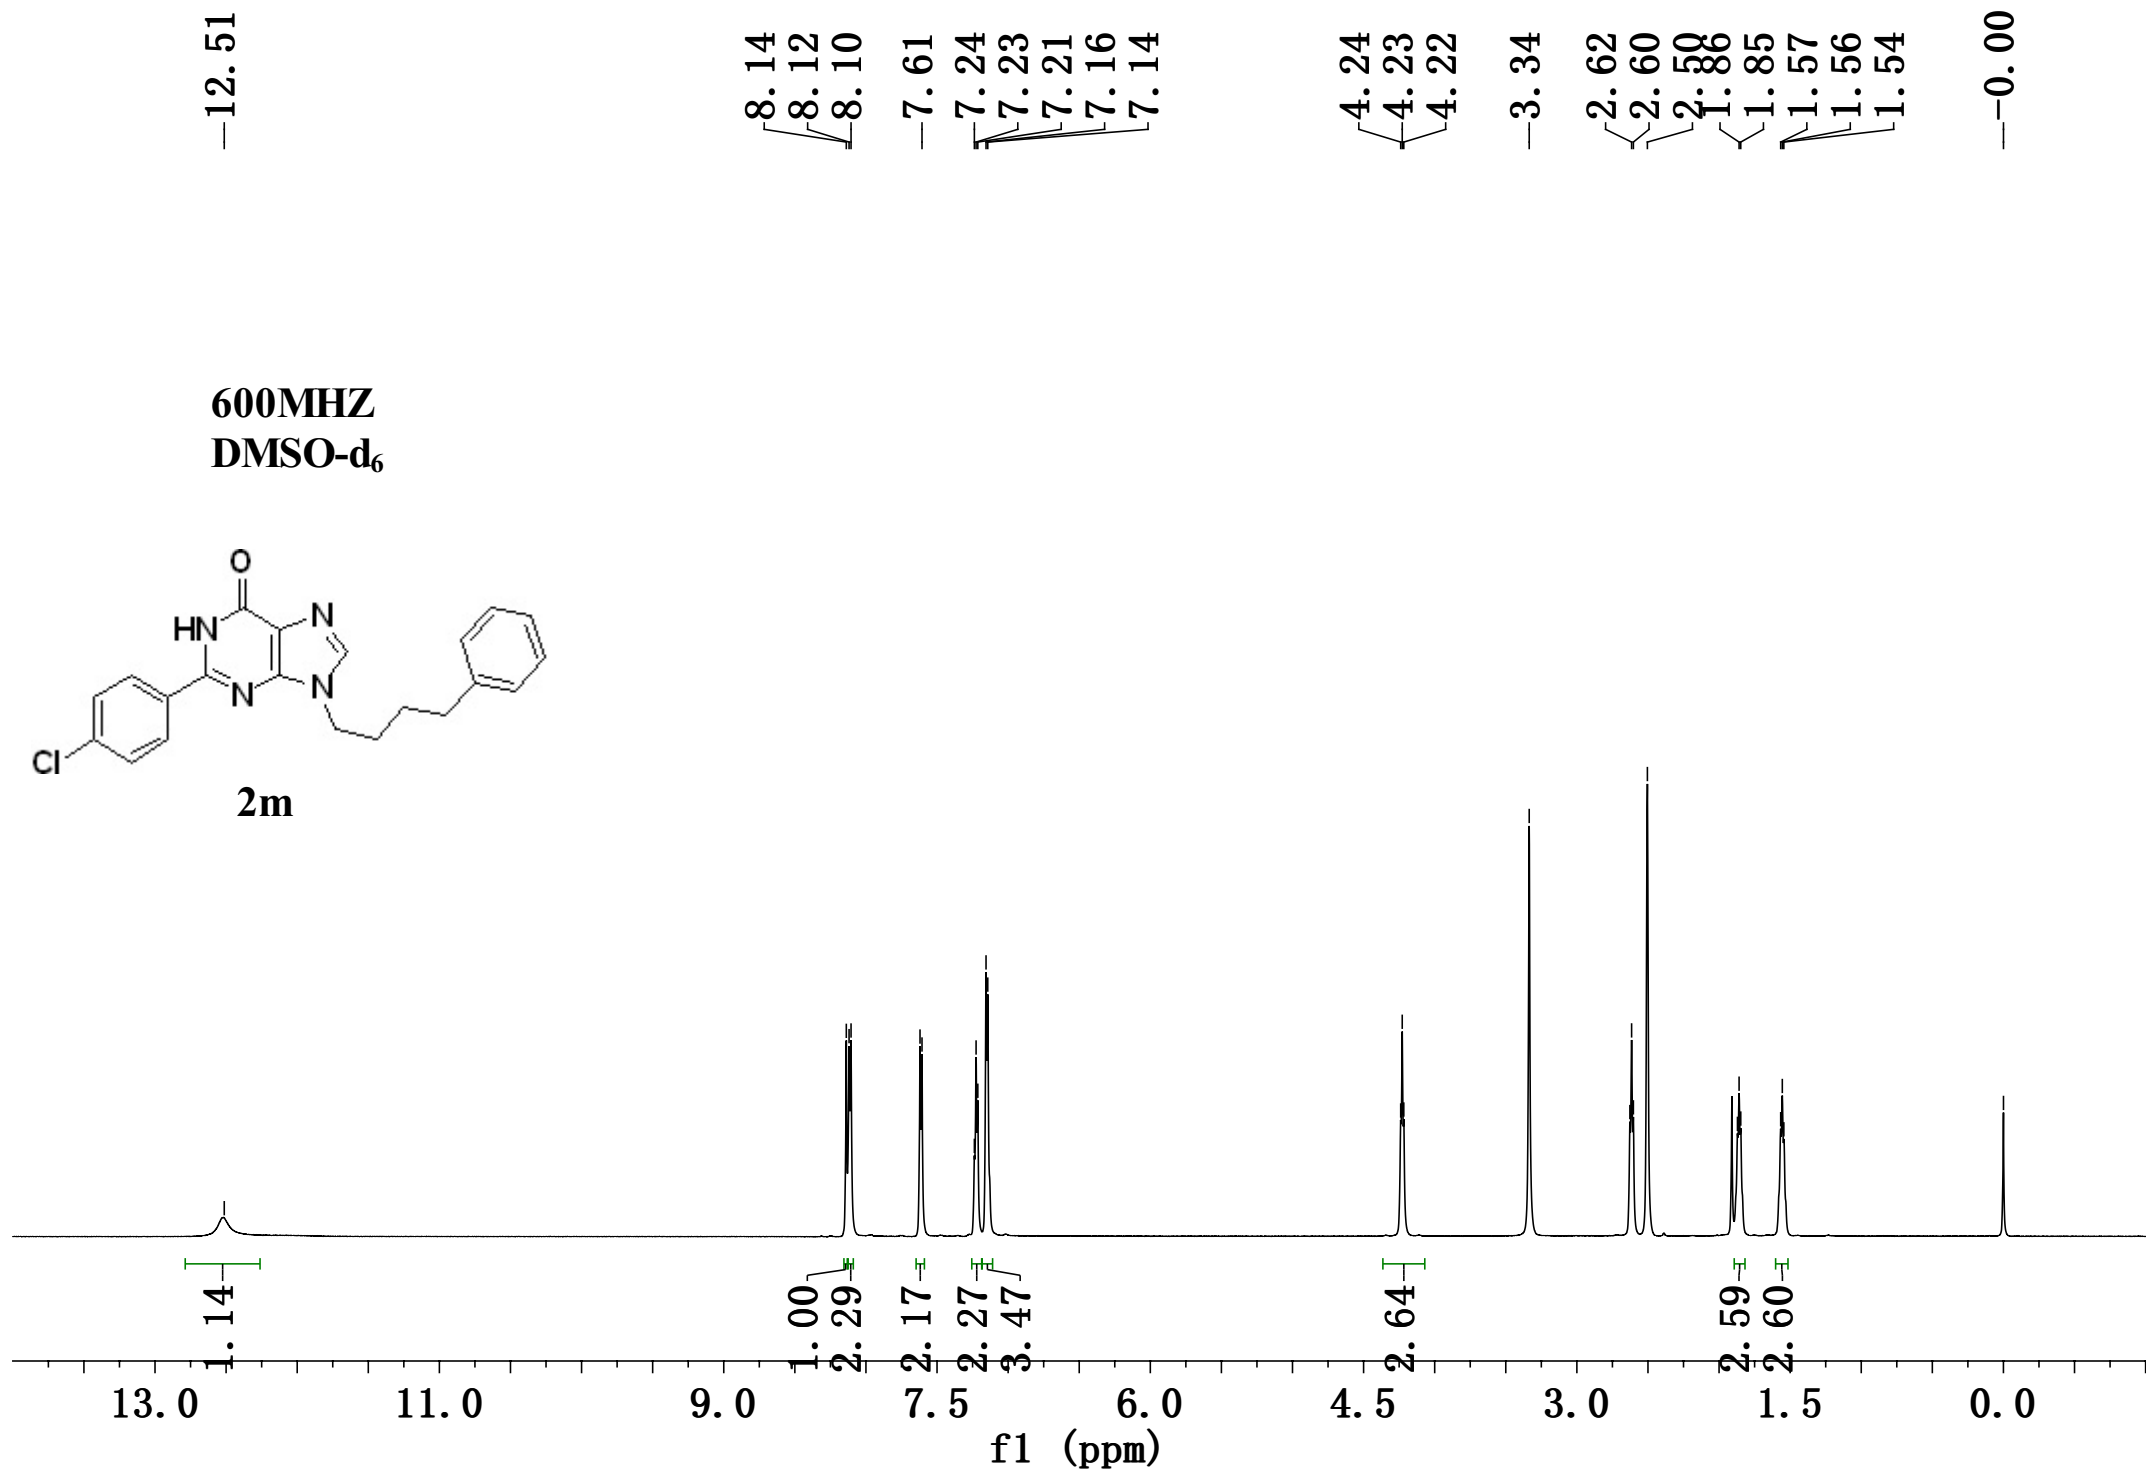

-12.49

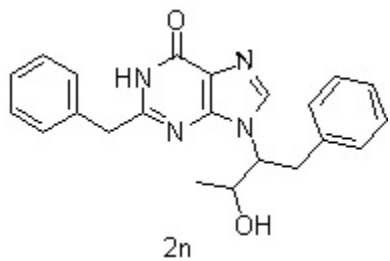

7.42  
7.41  
7.36  
7.34  
7.33  
7.32  
7.29  
7.27  
7.26  
7.14  
7.14  
6.84  
6.84  
6.83

4.39  
4.38  
4.13  
3.31  
3.29  
3.28  
3.25  
3.23  
3.21

-1.40

--0.00

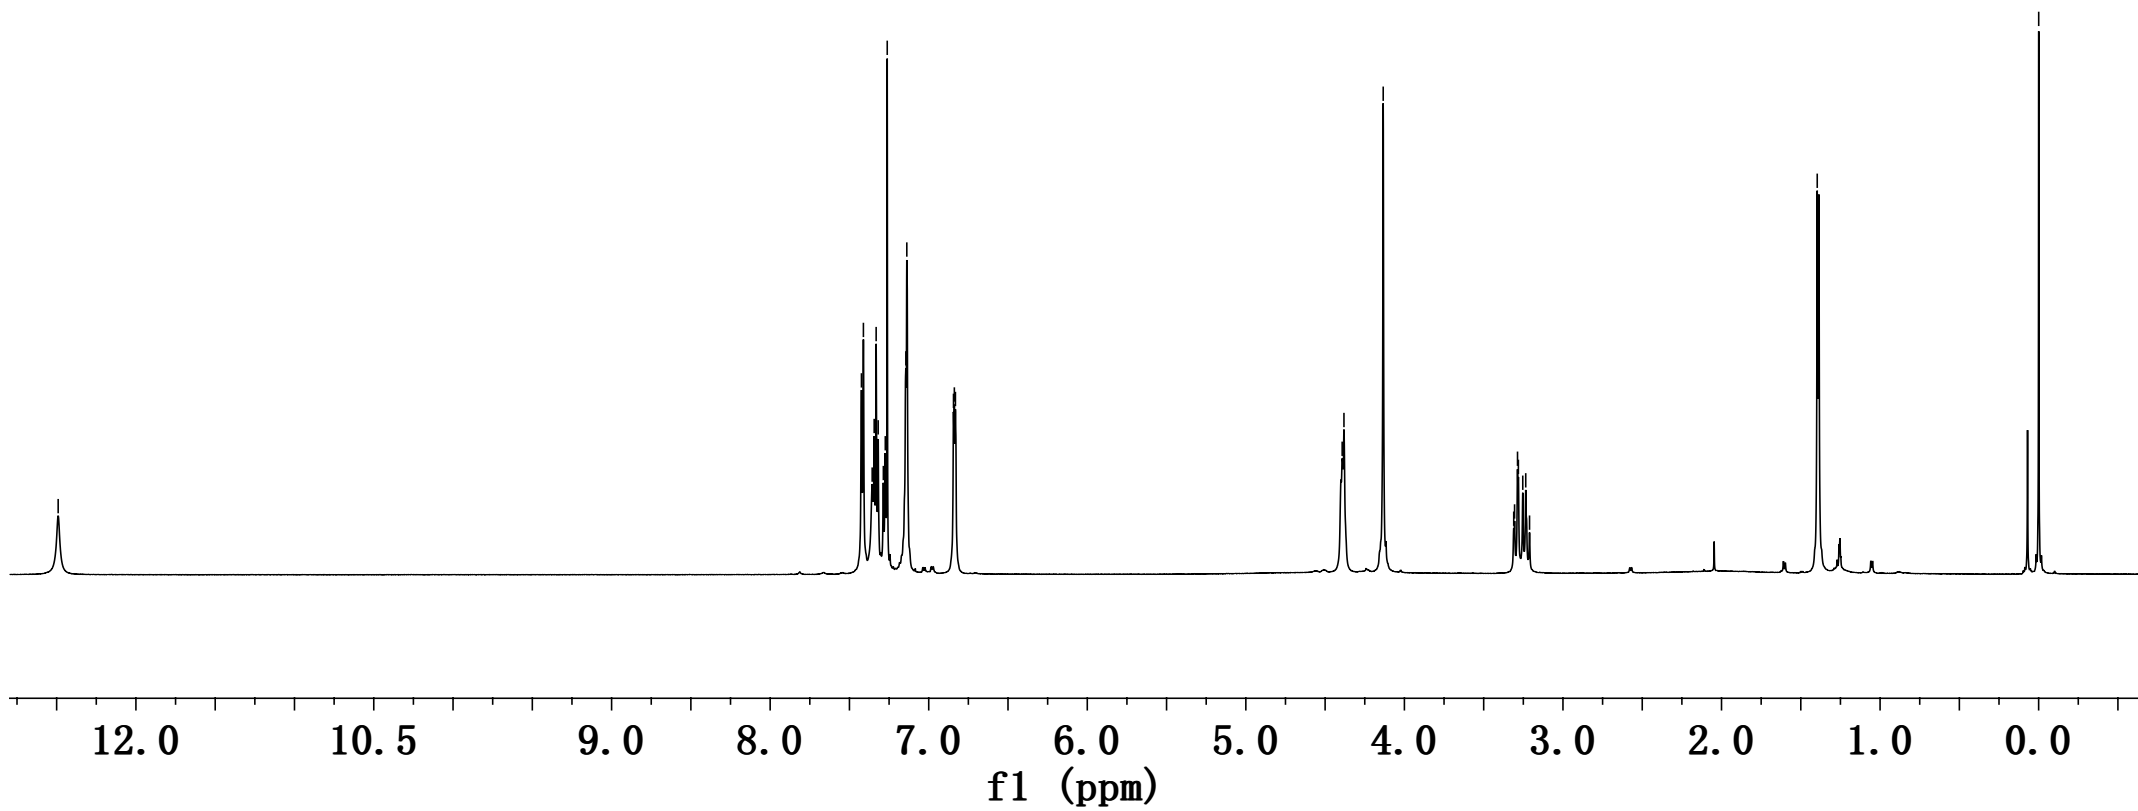

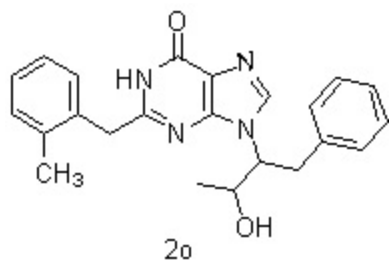

-12.24

-7.99

7.17

7.14

7.08

7.05

6.98

6.88

-5.29

-4.42

-3.91

3.22

3.18

2.73

2.32

-1.91

--0.00

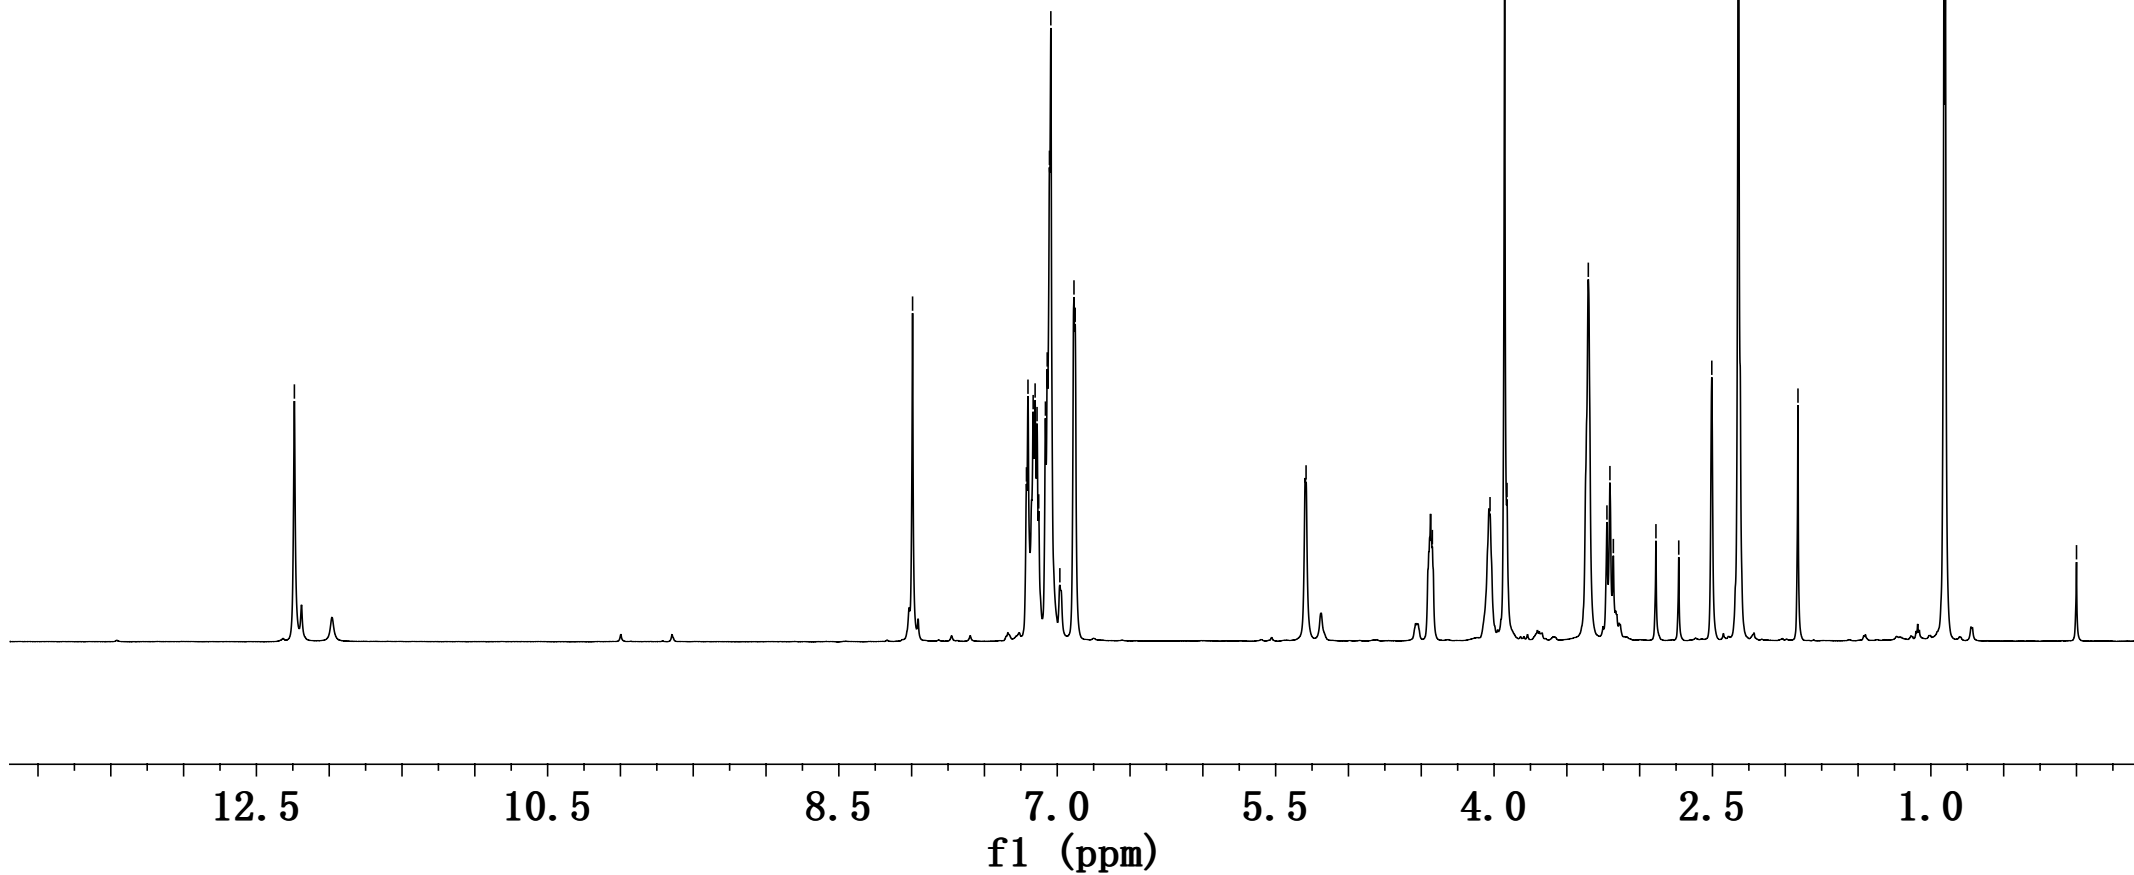

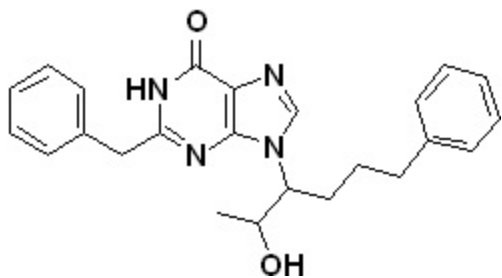

2p

600MHz  
DMSO-d<sub>6</sub>

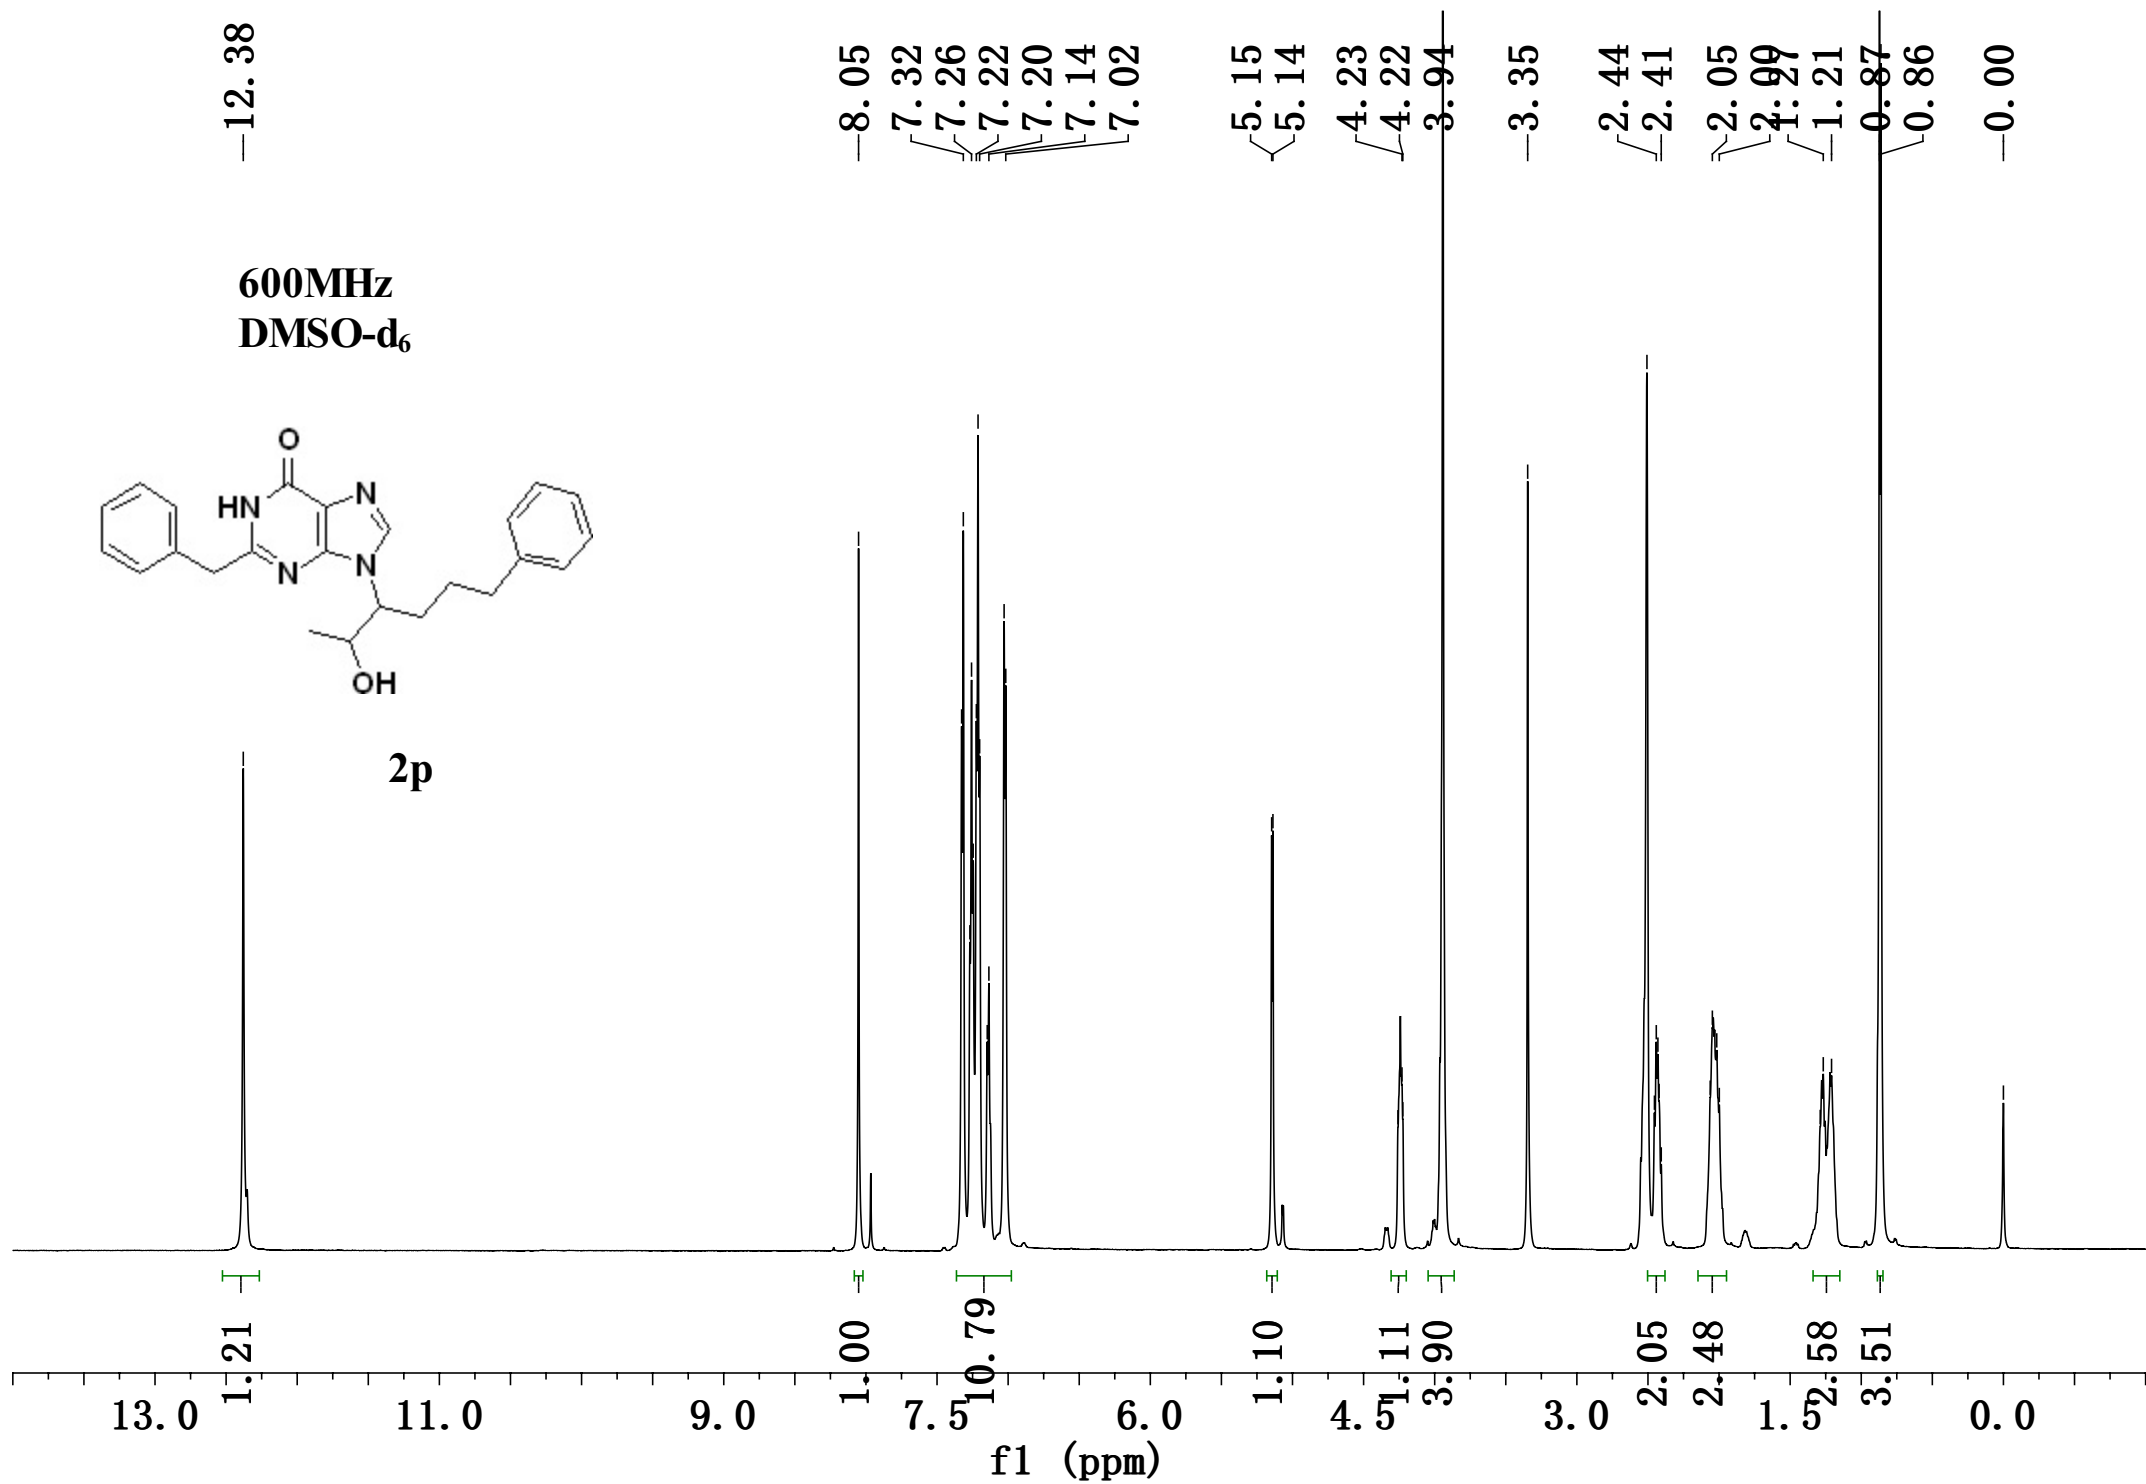



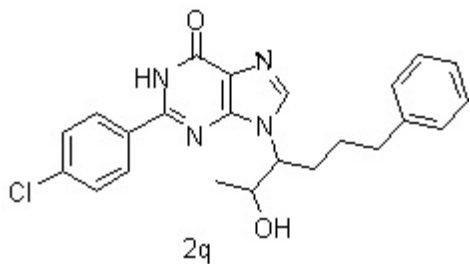

-12.54

8.16  
8.13  
8.12  
8.11  
8.07

-7.61

7.17  
7.09  
7.05

5.20  
5.19  
5.10  
4.39  
4.08  
4.02  
3.35

-3.17

-2.48

-1.87

-1.30

0.96  
0.92

-0.00

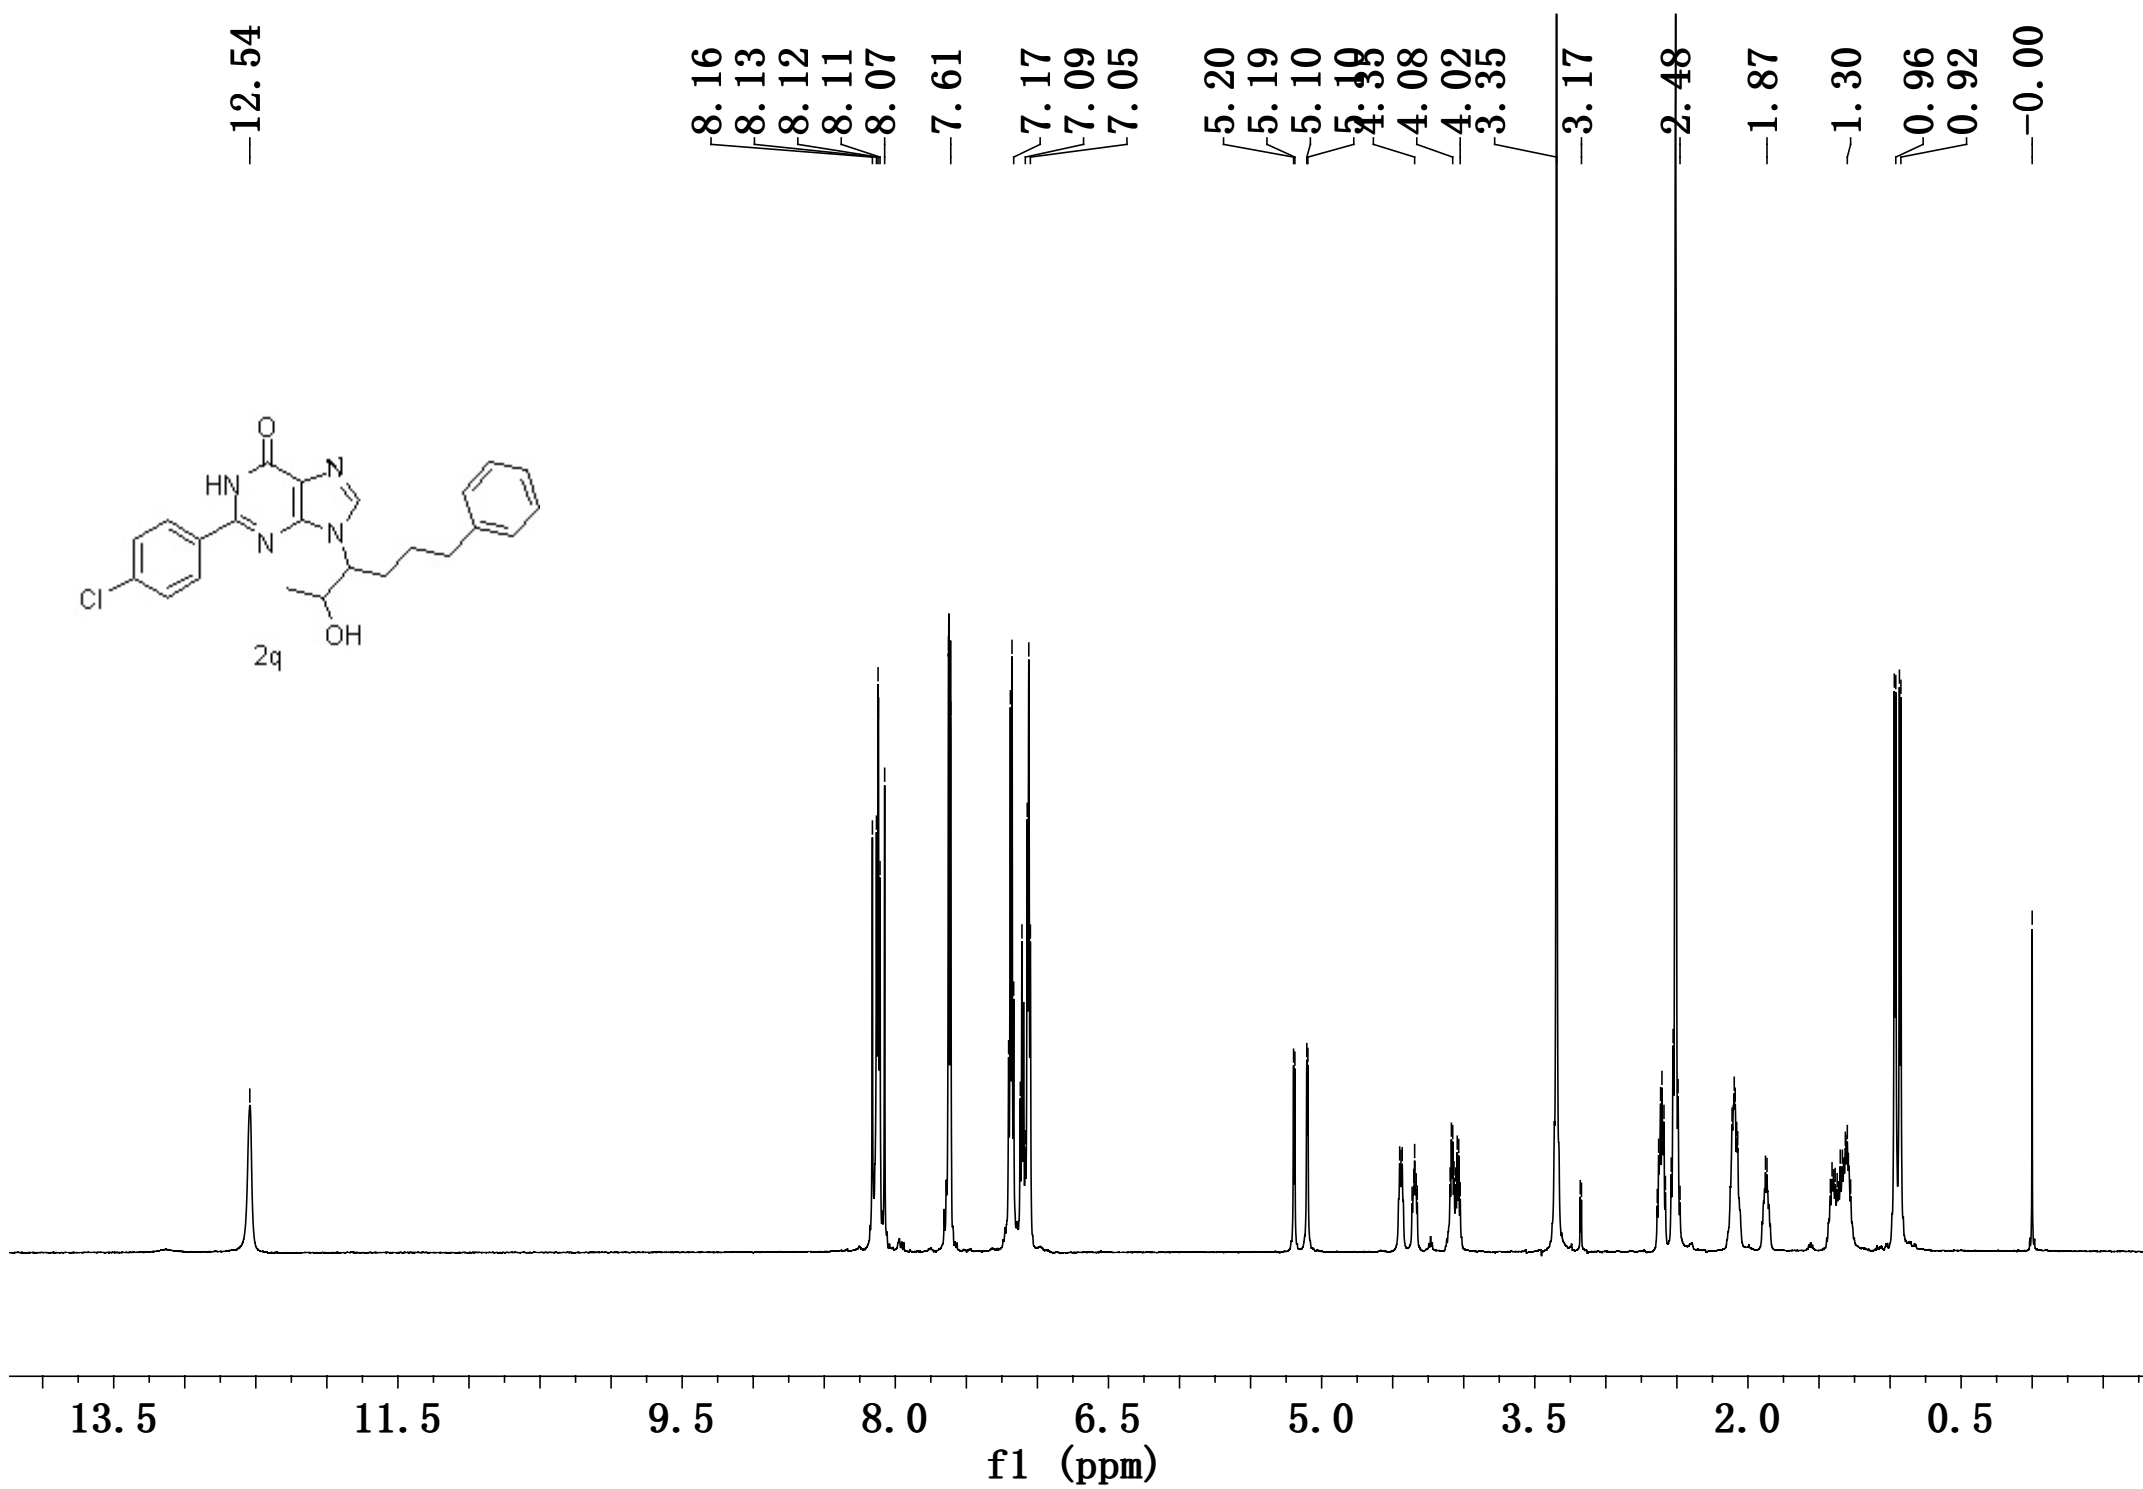

-13.00

-7.73  
-7.38

-7.16  
-6.98  
-6.96

-5.41  
-5.39  
-5.38  
-5.37

-4.08

-3.57  
-3.54  
-3.30  
-3.26

-2.15

-0.00

400MHz  
CDCl<sub>3</sub>

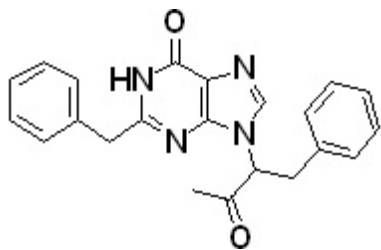

2r

0.91

1.00

1.96

1.45

1.14

2.89

1.90

0.97

2.04

1.00

0.96

3.37

12.5 11.0 9.5 8.0 6.5 5.0 3.5 2.0 0.5

f1 (ppm)

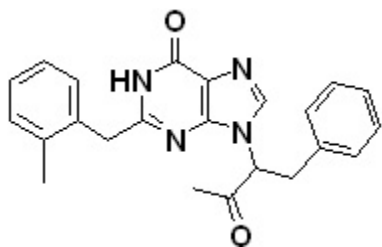

600MHz  
CDCl<sub>3</sub>

2s

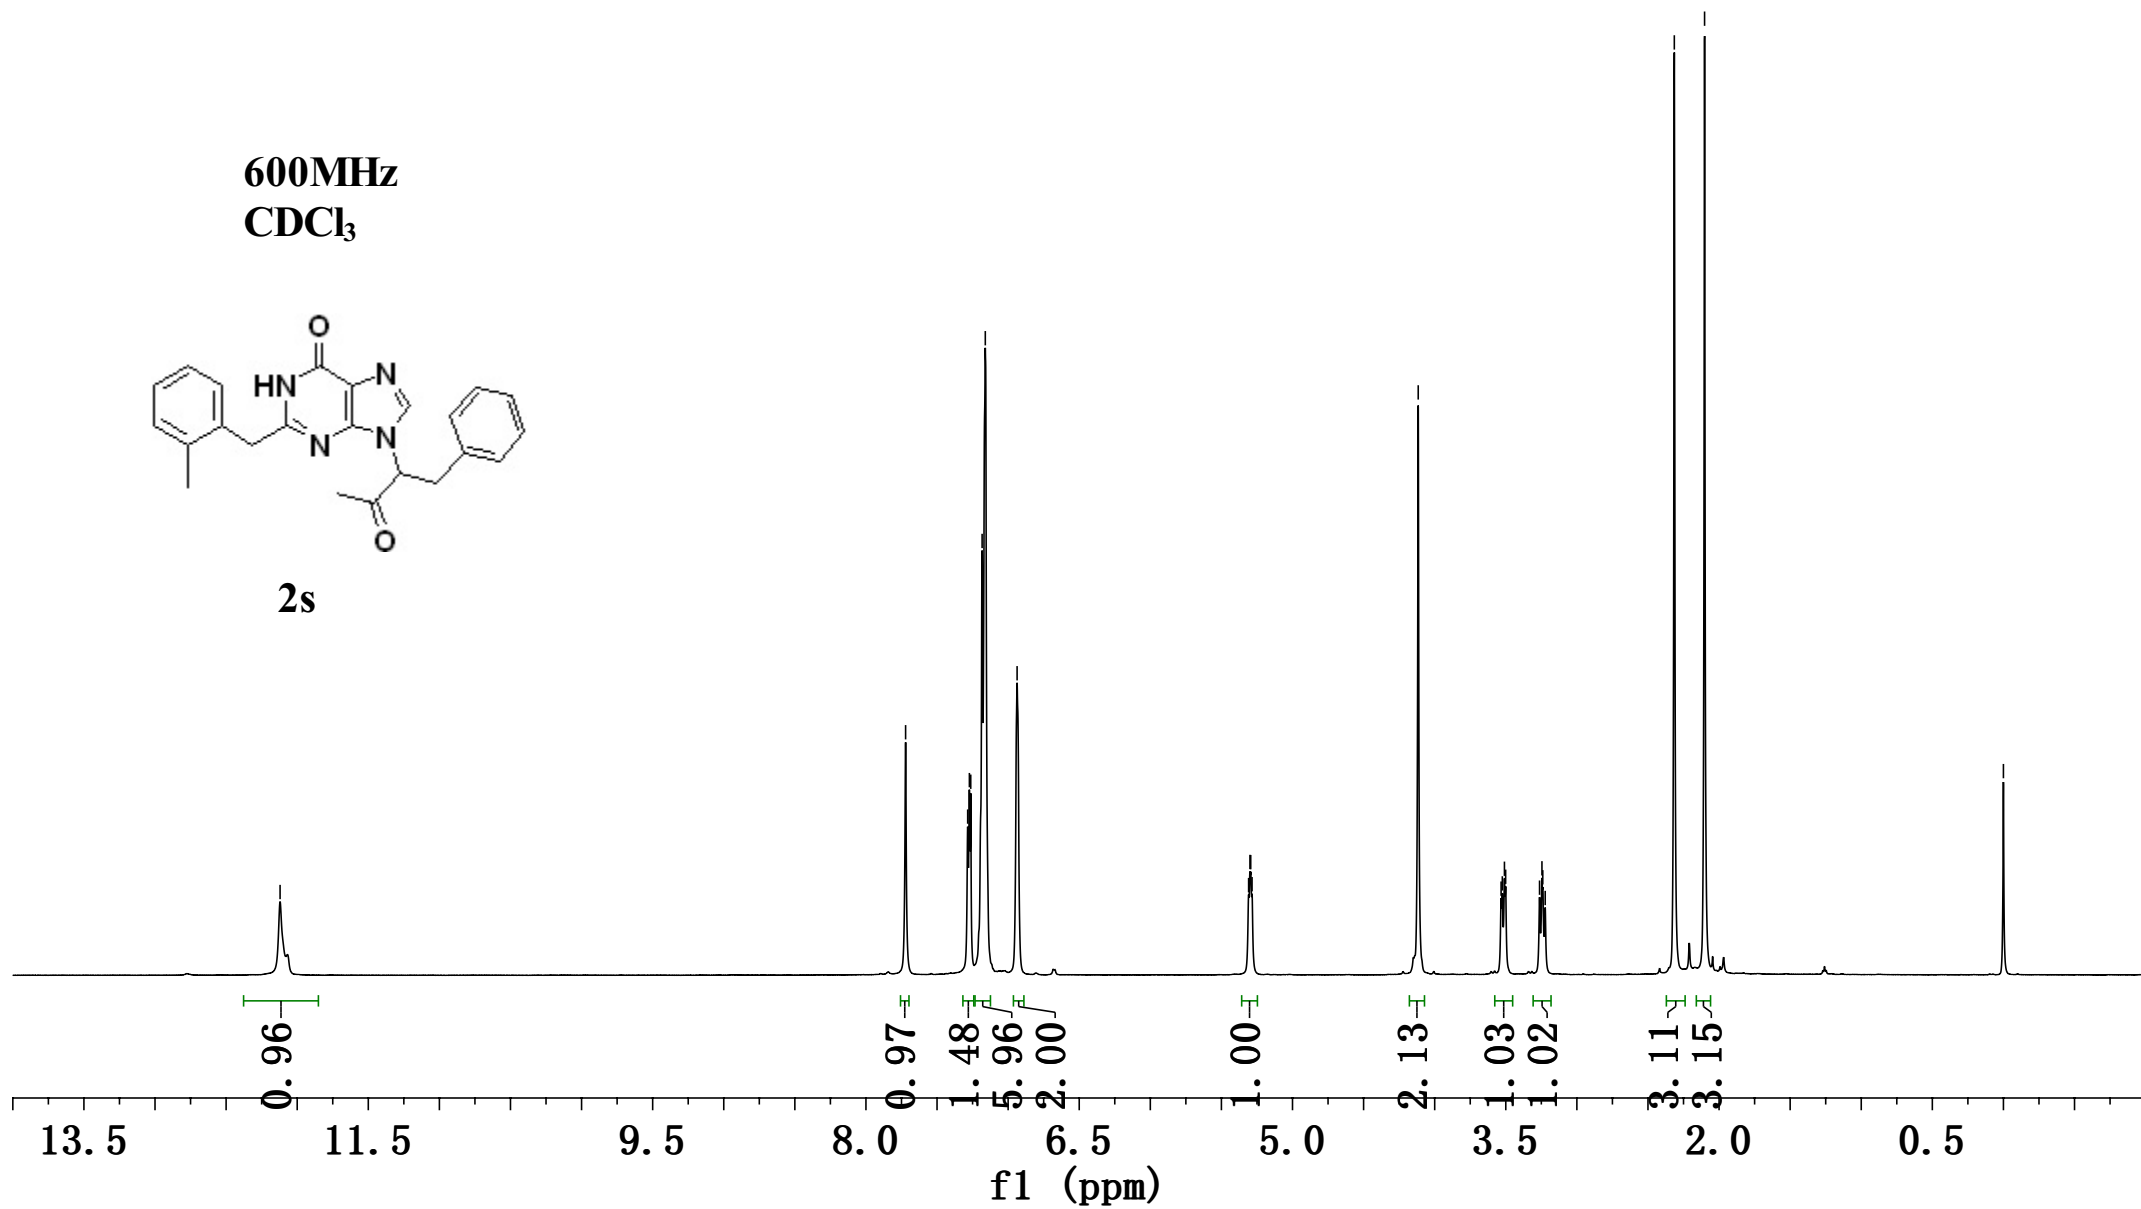

157.82  
157.25

149.36  
149.06  
148.25

141.11

129.36

122.43  
121.18

113.14  
112.32

59.85

56.03  
55.95  
55.85

46.49

39.93  
39.72

100MHz  
DMSO-d<sub>6</sub>

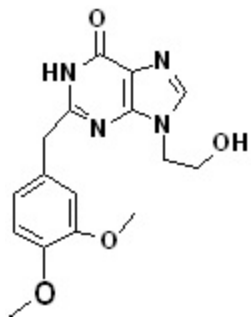

2b

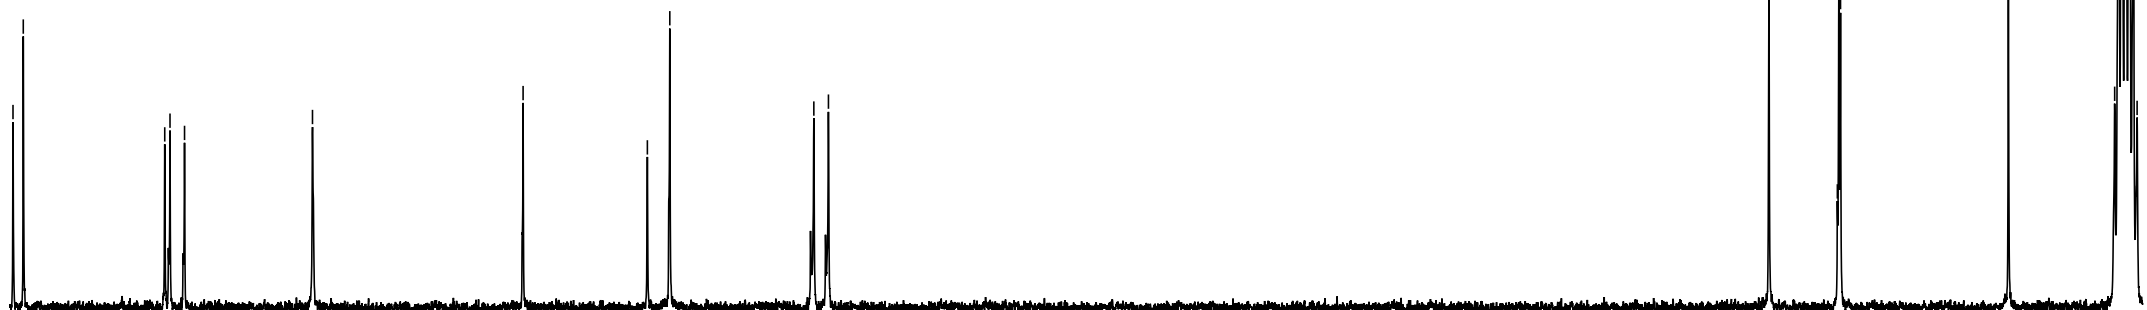

155

145

135

125

115

105

95

90

85

80

75

70

65

60

55

50

45

40

f1 (ppm)

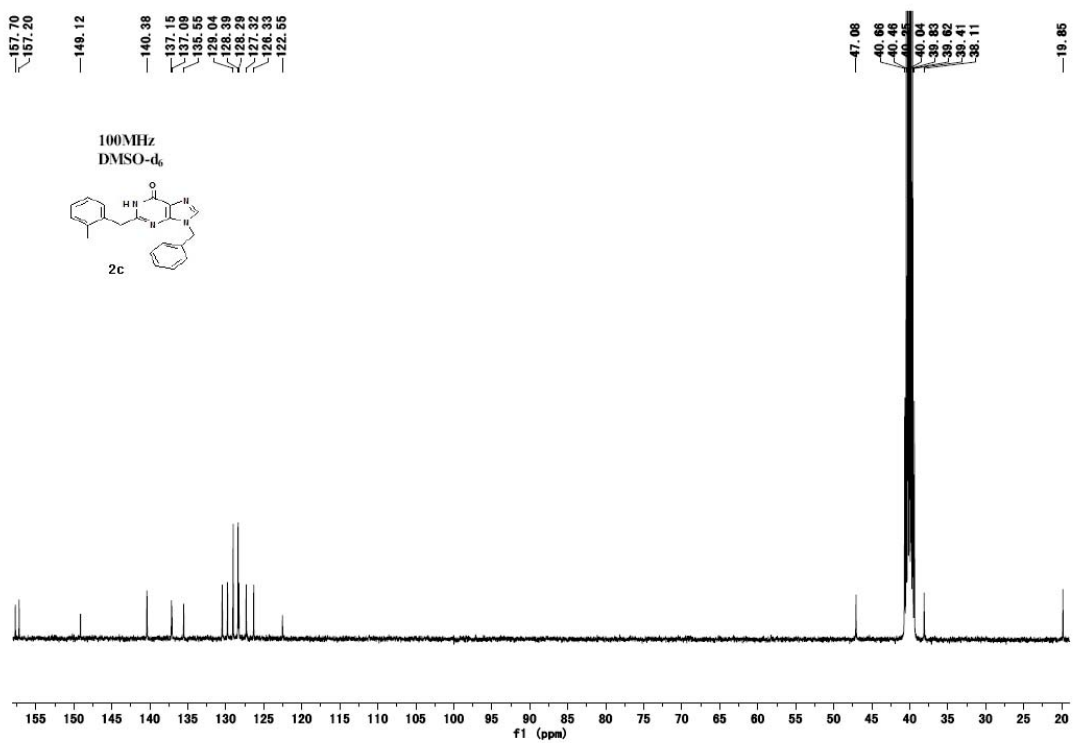

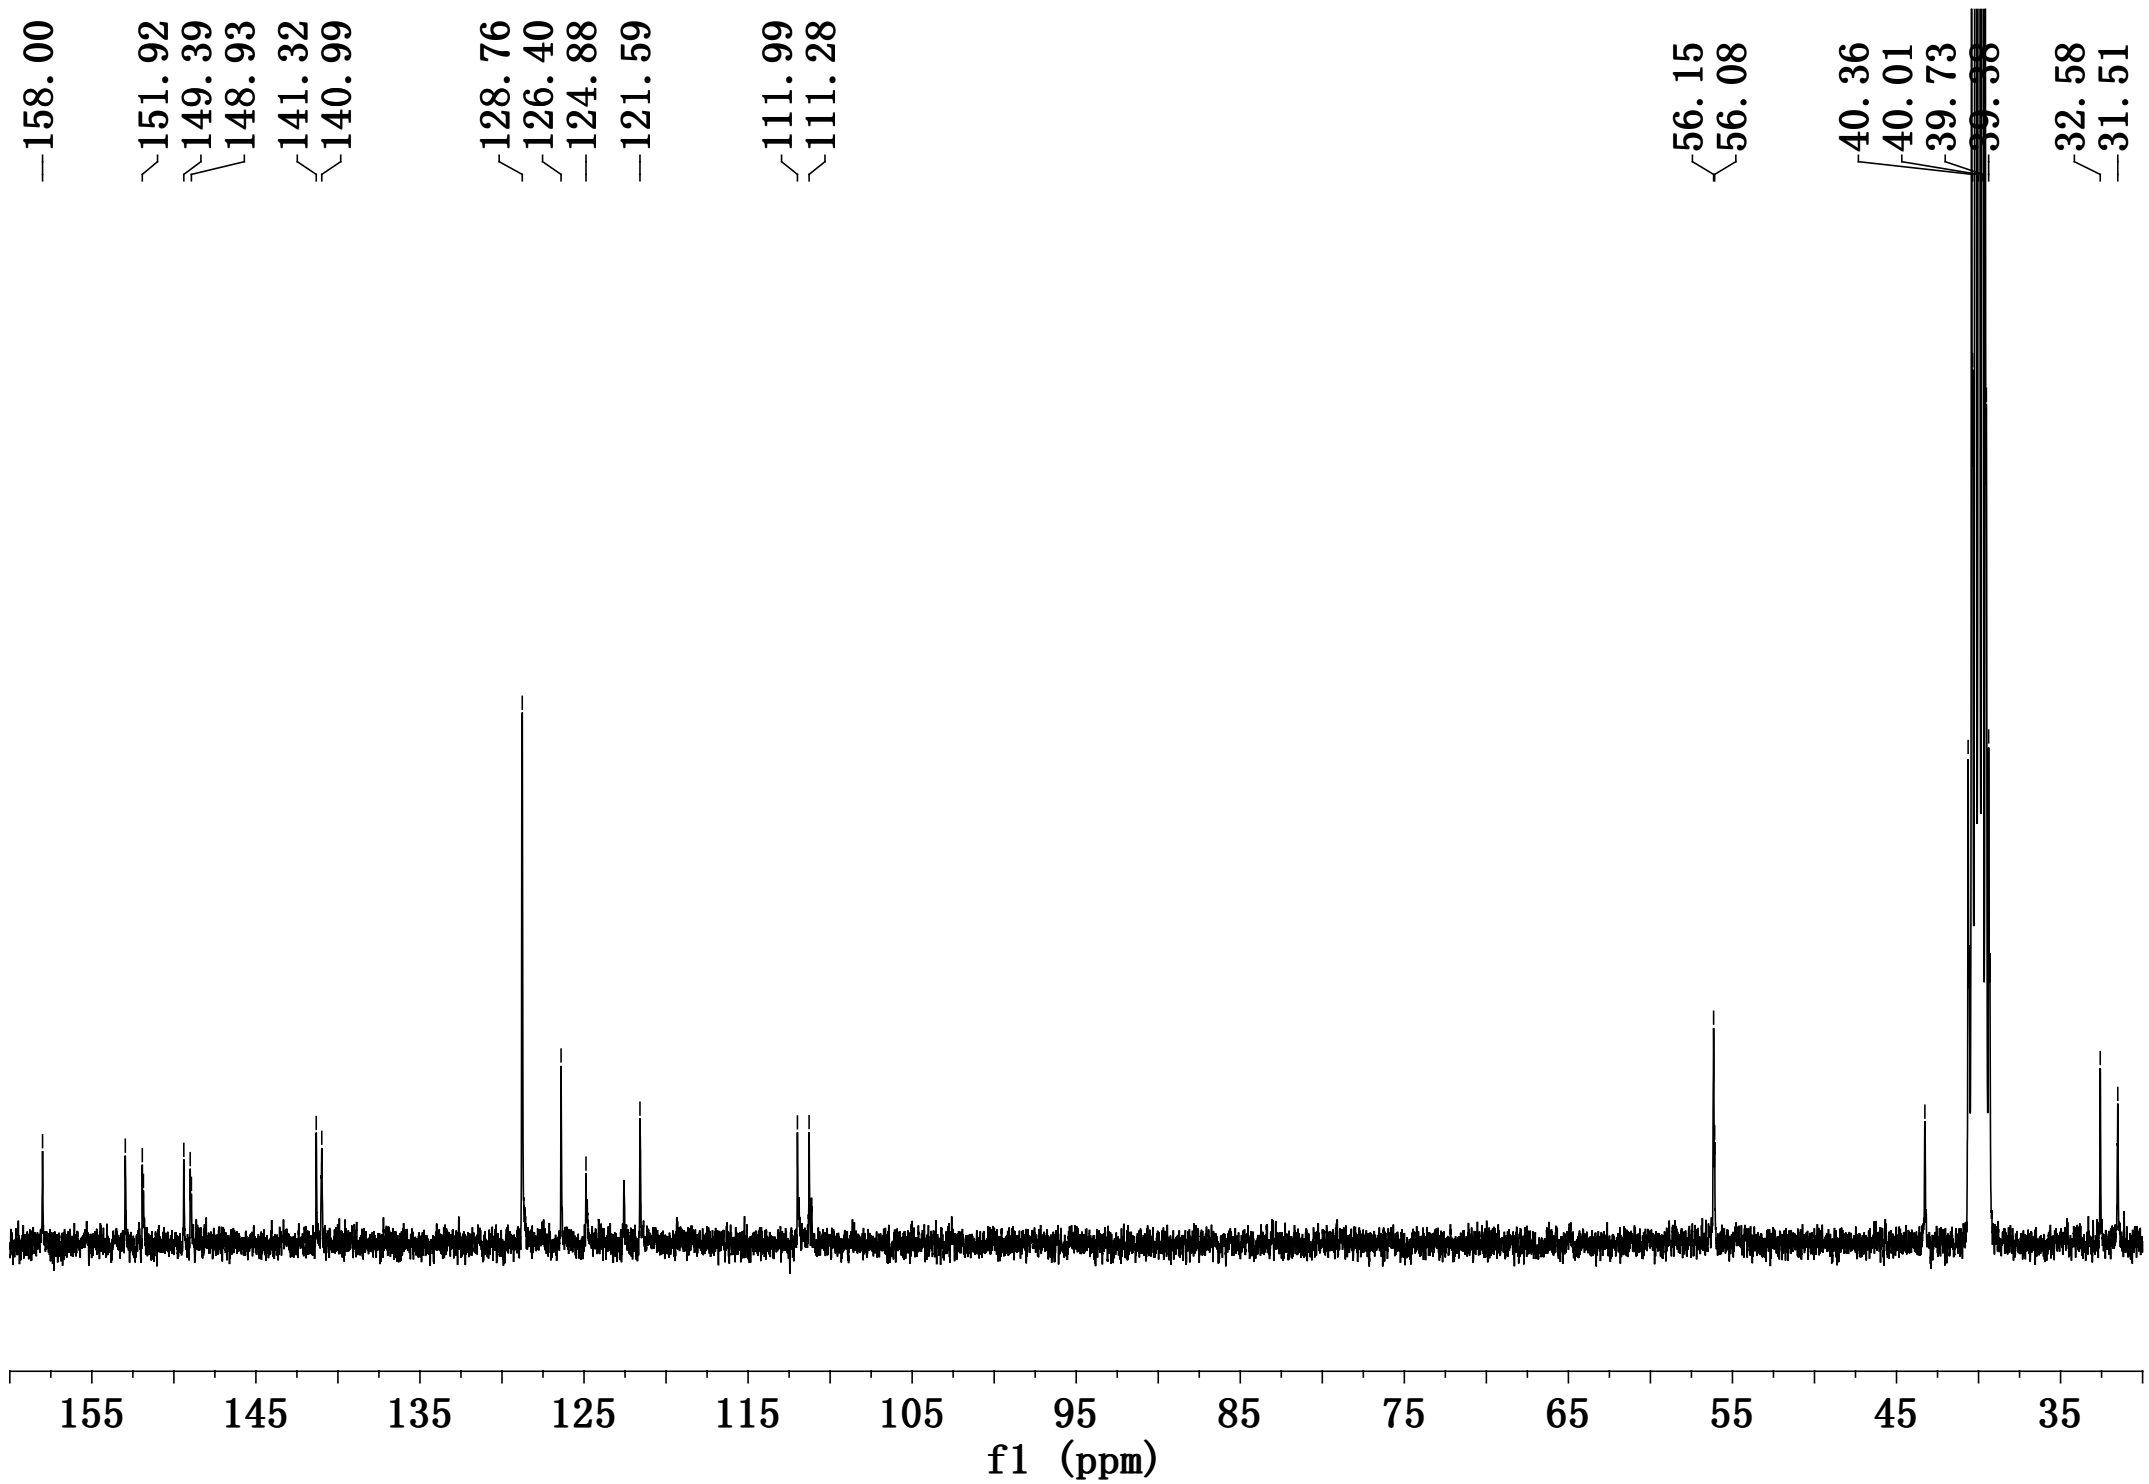

157.79  
156.98

149.33

141.27  
140.57

137.15  
129.19

128.66  
126.35

122.58

43.43

40.04  
39.41

32.53  
31.37

100MHz  
DMSO-d<sub>6</sub>

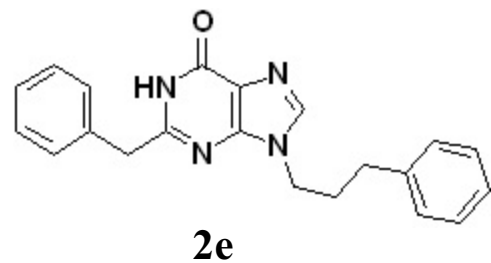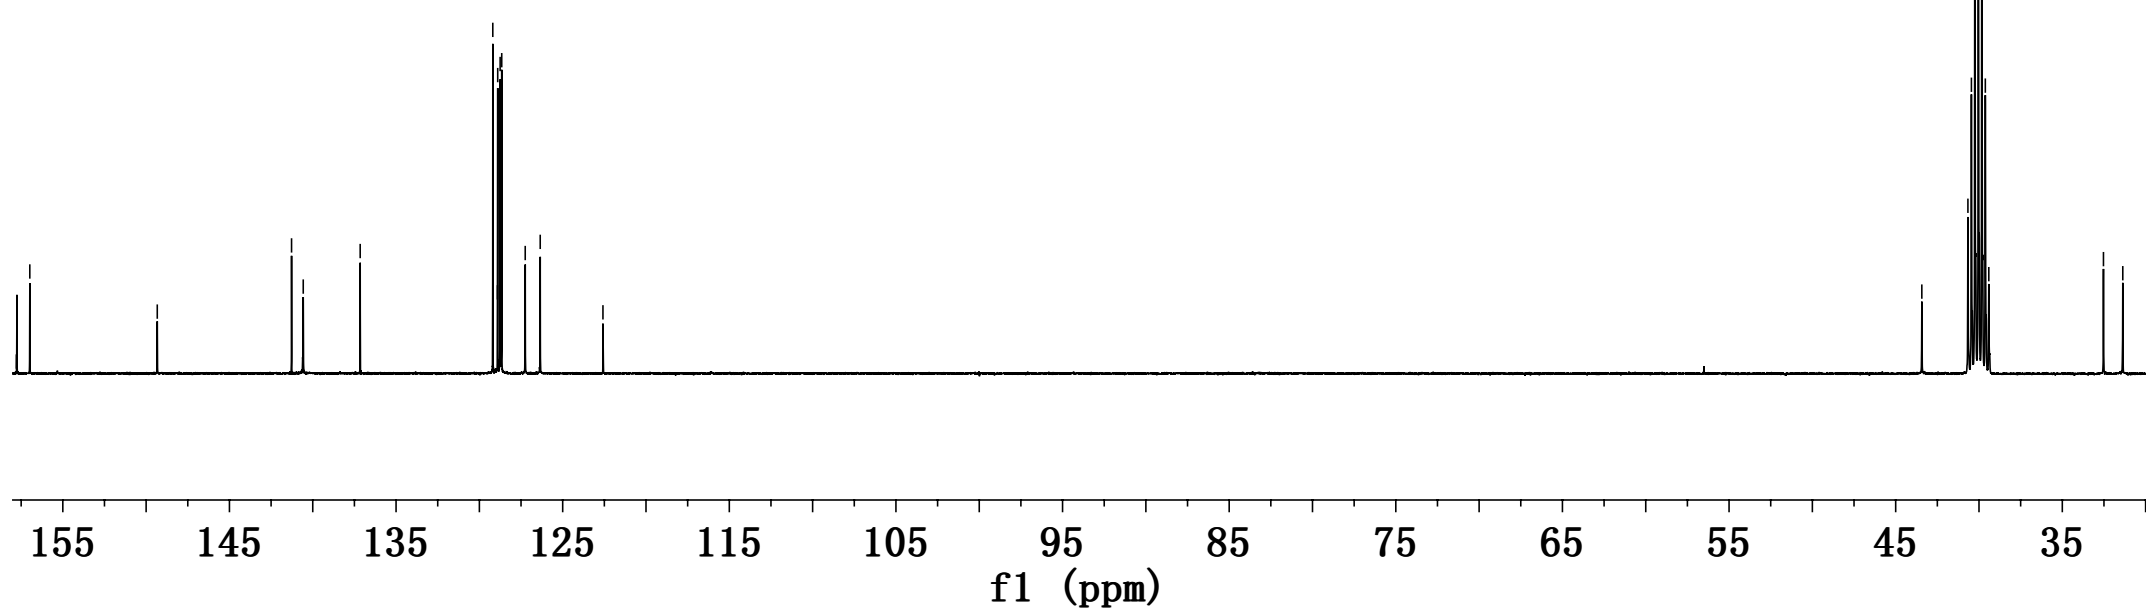

157.79  
156.86  
149.29  
141.22  
140.57  
135.70  
128.76  
126.35  
122.56

43.46  
40.65  
40.44  
40.23  
40.02  
39.81  
39.60  
39.39  
38.16  
32.54  
31.32  
19.92

100MHz  
DMSO-d<sub>6</sub>

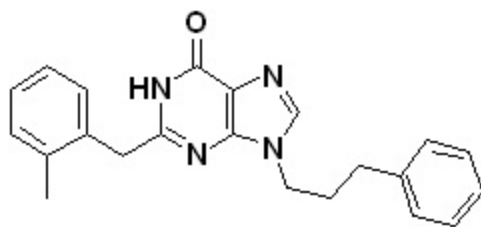

2f

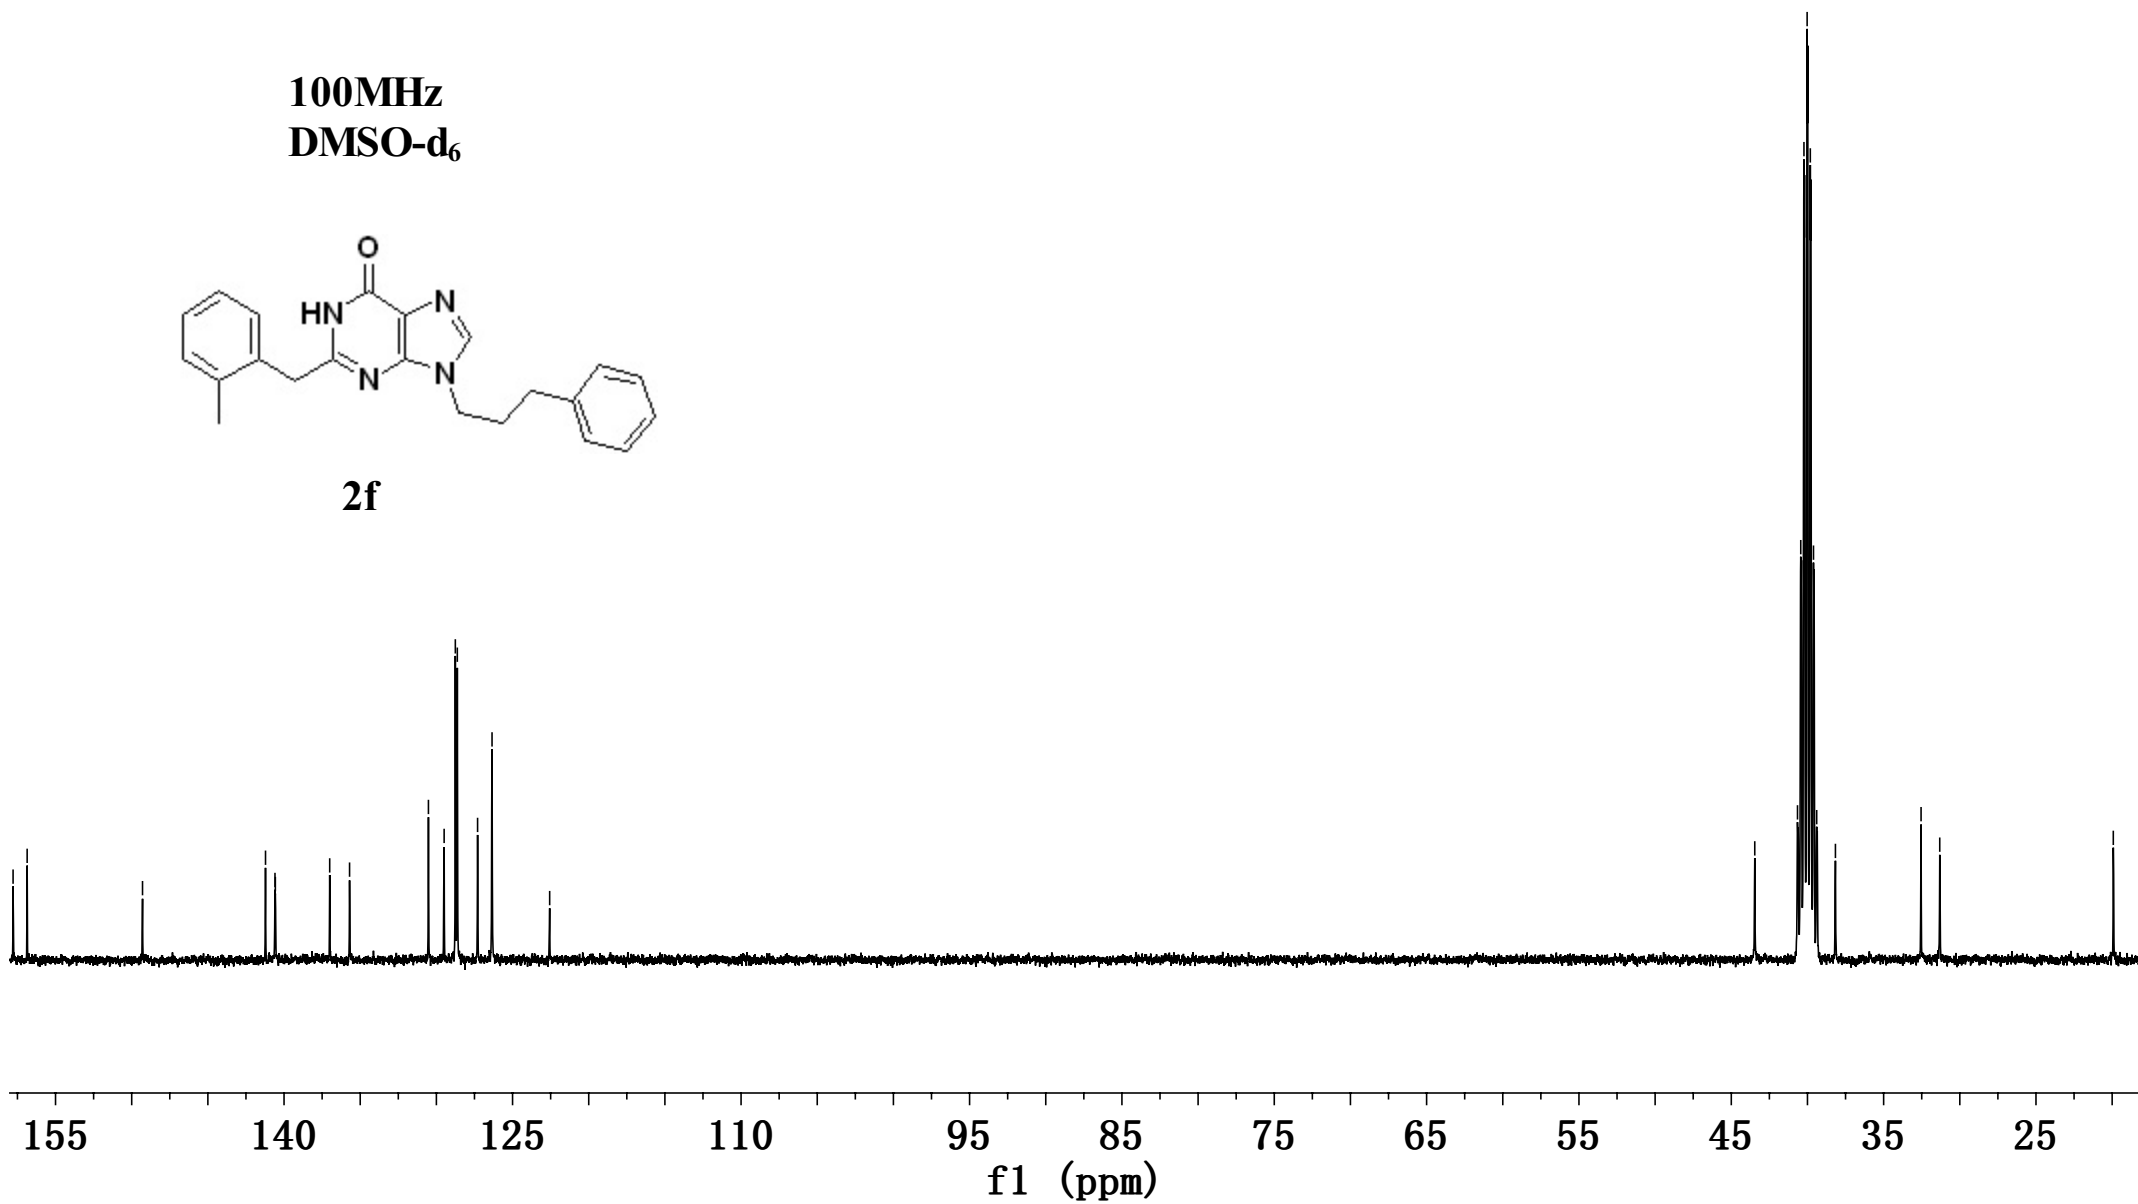

Supplement: f1 [file 6878353.f1.pdf]
